# Supplementary material
Source: PubMed Central journal article supplement (PMC4455060)
Supplement: bi5b00012_si_001.pdf [file bi5b00012_si_001.pdf]

## **Supporting Information**

### **Structural features of a 3' splice site in influenza A**

Jonathan L. Chen<sup>1</sup>, Scott D. Kennedy<sup>2</sup>, Douglas H. Turner<sup>1,3\*</sup>

<sup>1</sup> Department of Chemistry, University of Rochester, Rochester, New York, 14627, USA.

<sup>2</sup> Department of Biochemistry and Biophysics, University of Rochester School of Medicine and Dentistry, Rochester, New York 14642, USA.

<sup>3</sup> Center for RNA Biology, University of Rochester, Rochester, New York, 14627, USA.

jchen46@z.rochester.edu, Scott\_Kennedy@urmc.rochester.edu, turner@chem.rochester.edu

\*To whom correspondence should be addressed. Phone: (585) 275-3207. Fax: (585) 276-0205.  
E-mail: turner@chem.rochester.edu.

This work was supported by NIH Grant GM22939 (D.H.T.).

- Figure S1 Equilibria of 19-nt duplex mimics of a portion of the 39-nt hairpin with homodimers of the top strands of their duplexes.
- Figure S2 Fragments of the 39-nt hairpin used for modeling with CS-ROSETTA.
- Figure S3 Imino region of 1D proton spectra of the 39-nt hairpin acquired with 0, 5 and 10 mM  $Mg^{2+}$  at 4 °C.
- Figure S4 Imino to amino/non-exchangeable proton region of a 2D NOESY spectrum of the 39-nt hairpin.
- Figure S5 H1' to H6/H8 region of a 2D proton NOESY spectrum of the 39-nt hairpin showing sequential proton walks for residues G2 to G10 and U33 to U39.
- Figure S6 Thermodynamics calculations with the nearest neighbor model showing that the 11-nt hairpin conformation is preferred to a duplex formed by self-dimerization of the RNA sequence.
- Figure S7 Imino proton region of the 11-nt hairpin at a strand concentration of 0.2 mM and 4 mM.
- Figure S8 Imino region of 1D proton spectra of the 11-nt hairpin acquired with 0 and 5 mM  $Mg^{2+}$  at 5 °C.
- Figure S9 Imino region of 1D proton spectra of the 19-nt duplex acquired with 0 and 5 mM  $Mg^{2+}$  at 5 °C.
- Figure S10 Differences in chemical shifts of select non-exchangeable hydrogens of the 11-nt hairpin with and without 5 mM  $Mg^{2+}$  at -2 °C.
- Figure S11 Differences in chemical shifts of select non-exchangeable hydrogens of the 19-nt duplex with and without 5 mM  $Mg^{2+}$  at -2 °C.
- Figure S12 The ensemble of the 10 structures of the 11-nt hairpin modeled in AMBER with the lowest distance restraint violation energies and which agreed with NMR restraints.
- Figure S13 The ensemble of the 10 structures of the 19-nt duplex modeled in AMBER with the lowest distance restraint violation energies and which agreed with NMR restraints.
- Figure S14 Calculated structure of the hairpin loop of the 11-nt hairpin construct.
- Figure S15 H1' to H2' region of a 2D TOCSY spectrum of the 11-nt hairpin.
- Figure S16 H1' to H2' region of a 2D TOCSY spectrum of the 19-nt duplex.

- Figure S17 Calculated structure of the internal loop of the 19-nt duplex construct.
- Figure S18 Chemical shift differences of the 19-nt duplex between experiment, assigned at 25 °C in the presence of 5 mM Mg<sup>2+</sup>, and those predicted by NUCHEMICS for H2/H5, H6/H8, H1' and H2' in an ensemble of 20 structures generated with NMR restraints.
- Figure S19 Chemical shift differences of the 11-nt hairpin between experiment, assigned at 20 °C in the presence of 5 mM Mg<sup>2+</sup>, and those predicted by NUCHEMICS for H2/H5, H6/H8, H1' and H2' in an ensemble of 20 structures generated with NMR restraints.
- Figure S20 Differences between experimental and NUCHEMICS-predicted chemical shifts of a GAAA hairpin, closed by a GU pair, which consists of a helical region of a group II intron.
- Figure S21 Differences between experimental and NUCHEMICS-predicted chemical shifts of a GAAA hairpin, closed by a GC pair, which contains an internal loop from a ribozyme.
- Figure S22 Differences between experimental and NUCHEMICS-predicted chemical shifts of a GAAA hairpin, closed by an AU pair, which consists of a helical region of a ribozyme.
- Figure S23 Differences between experimental chemical shifts of the 39-nt hairpin, assigned at 20 °C, and those predicted by NUCHEMICS for H2/H5, H6/H8, H1' and H2' in an ensemble of 20 structures of the 19-nt hairpin generated by CS-ROSETTA with chemical shift restraints.
- Figure S24 Differences between experimental chemical shifts of the 39-nt hairpin, assigned at 20 °C, and those predicted by NUCHEMICS for H2/H5, H6/H8, H1' and H2' in an ensemble of 20 structures of the 18-nt duplex generated by CS-ROSETTA with chemical shift restraints.
- Figure S25 Secondary structure of a hairpin with a 2 × 2 internal loop from a group II intron of *Oceanobacillus iheyensis*.
- Table S1 Chemical shifts used to model fragments of the segment 7 hairpin with CS-ROSETTA.
- Table S2 Assigned chemical shifts of the 39-nt 3' splice site segment 7 hairpin construct.
- Table S3 Assigned chemical shifts of the 11-nt hairpin construct.
- Table S4 Assigned chemical shifts of the 19-nt duplex construct.

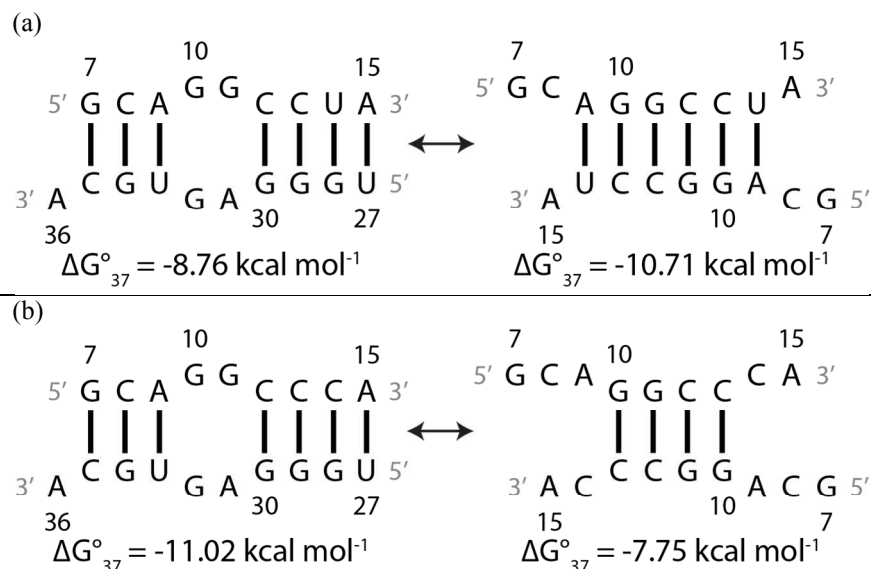

Figure S1: Equilibria of 19-nt duplex mimics of a portion of the 39-nt hairpin with homodimers of the top strands of their duplexes. (a) If residue 14 of a duplex is a uridine, as in the 39-mer, then a homodimer may form that is more stable than the target heterodimer. (b) If residue 14 of a duplex is a cytidine, then the analogous homodimer is less stable than the target heterodimer.

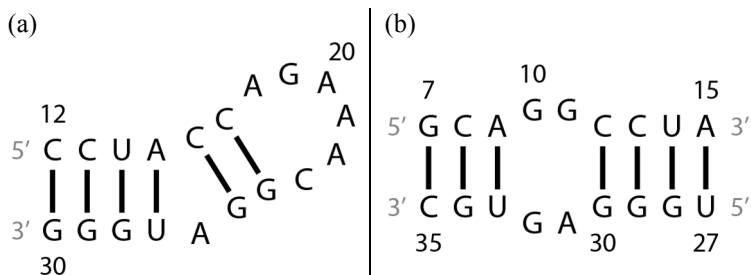

Figure S2: Fragments of the 39-nt hairpin used for modeling with CS-ROSETTA.<sup>1,2</sup> (a) The 19-nt hairpin with the A26 bulge and hairpin loop. (b) The 18-nt duplex with the  $2 \times 2$  nt internal loop.

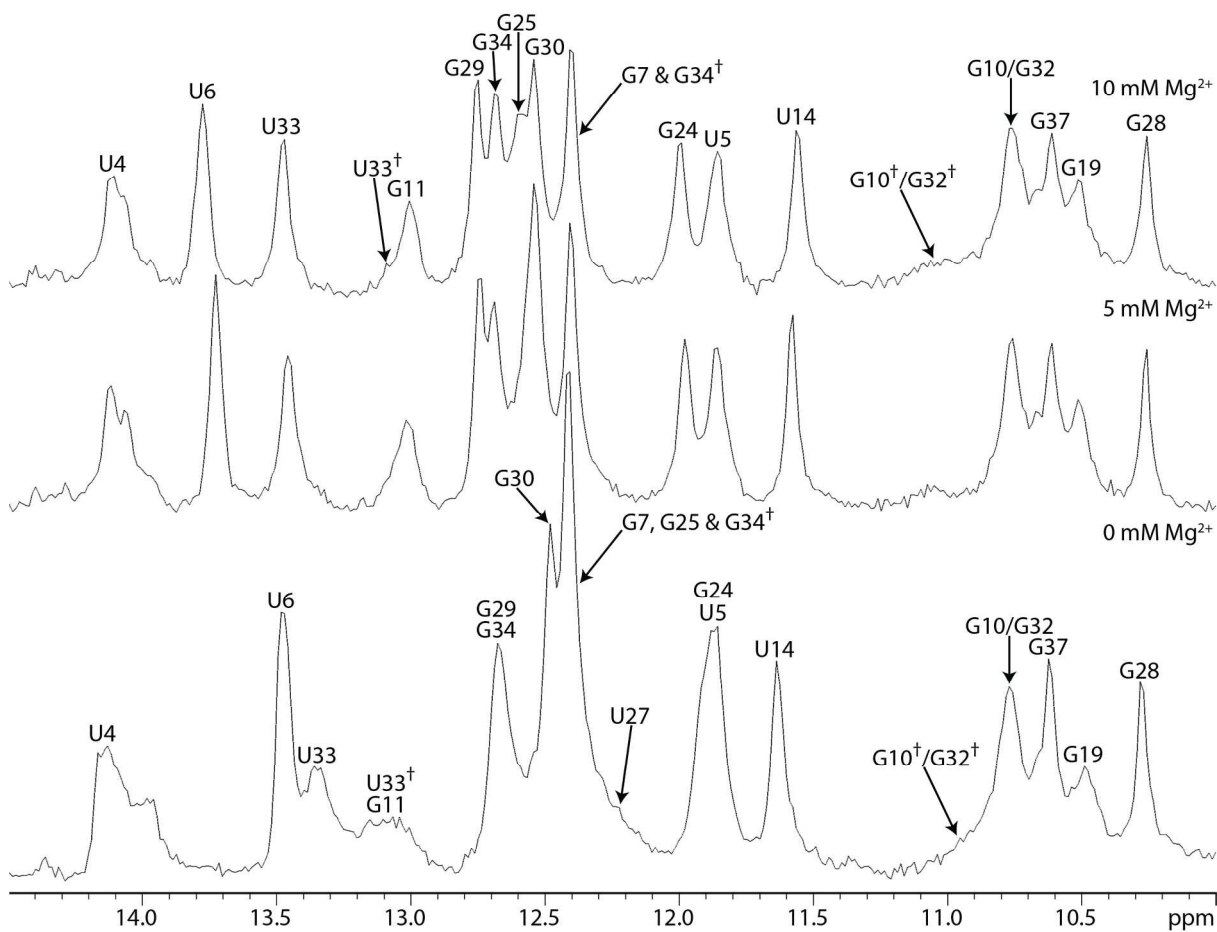

Figure S3: Imino region of 1D proton spectra of the 39-nt hairpin acquired with 0, 5 and 10 mM  $Mg^{2+}$  at 4 °C. These spectra were acquired on the 39-nt hairpin synthesized with commercial transcription kits and do not have a signal for U39. † Chemical exchange peak.



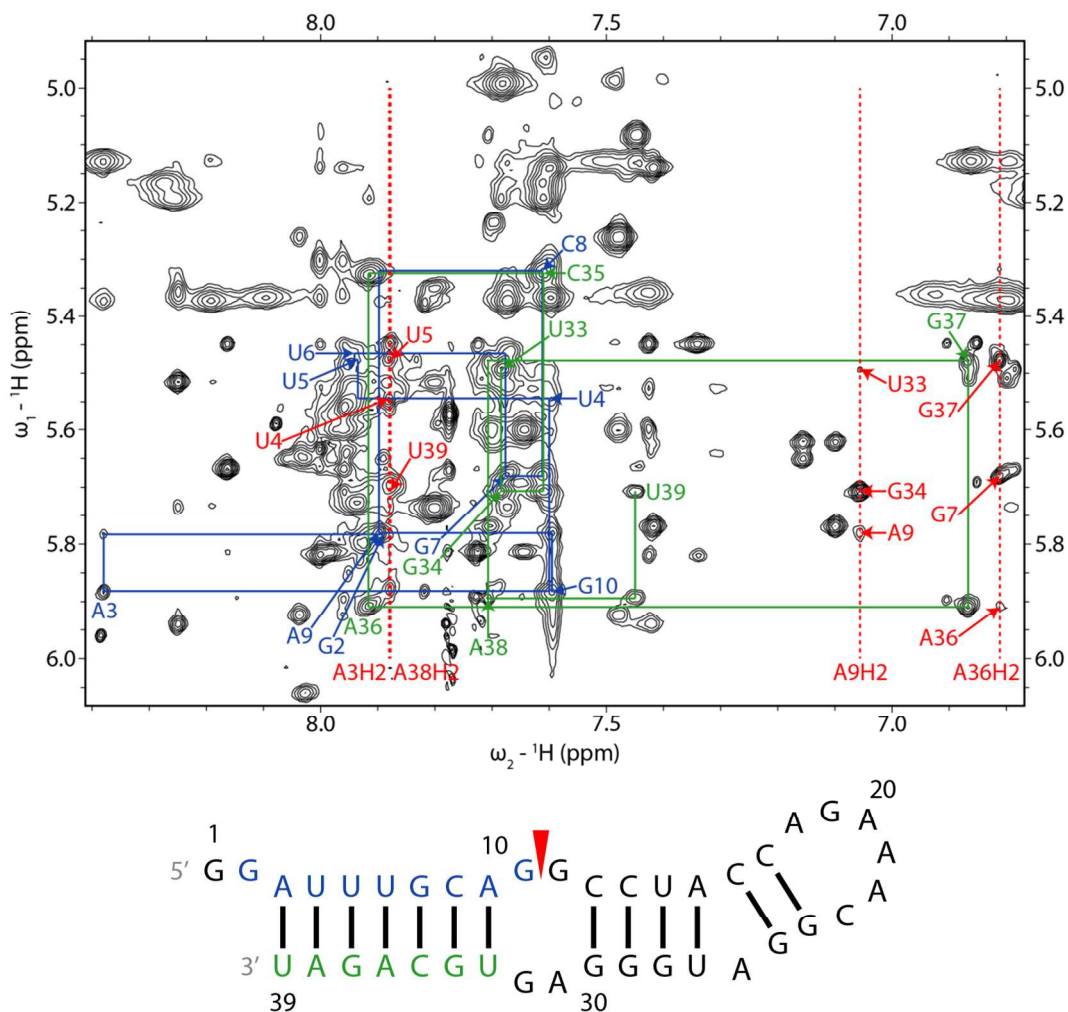

Figure S5: H1' to H6/H8 region of a 2D proton NOESY spectrum of the 39-nt hairpin showing sequential proton walks for residues G2 to G10 and U33 to U39. H1' to H6/H8 walk NOEs are labeled blue for residues 2 to 10 and green for residues 33 to 39. Adenine H2 signals are labeled with red dashed lines. H1' to adenine H2 NOEs are labeled red with only the label of the residue for the H1'. Spectrum was acquired at 20 °C and 350 ms mixing time with a WATERGATE pulse to suppress the water signal. In the secondary structure of the 39-nt hairpin., residues whose intrasidue H1' to H6/H8 NOEs were identified in the NOESY walks are labeled blue for residues 2 to 10 and green for residues 33 to 39.

---

Equilibrium of hairpin and duplex conformations.

---

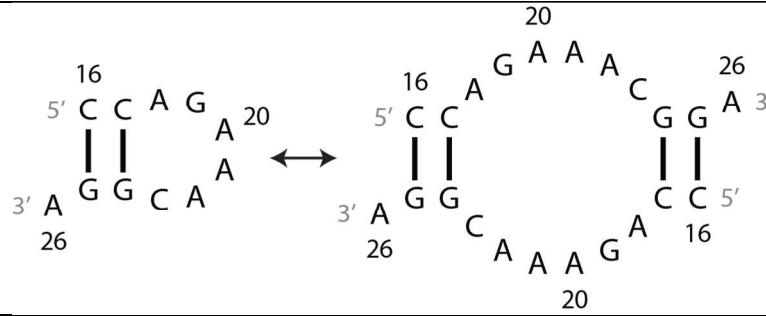


---

Equilibria between single strands and hairpin and duplex conformations.

---

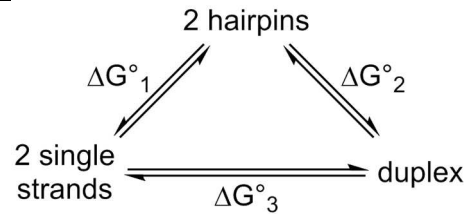


---

Calculate concentration of RNA in hairpin at 2 °C.

---

$$\Delta H_{\text{hairpin}}^{\circ} = -29.29 \text{ kcal mol}^{-1} \text{ and } \Delta S_{\text{hairpin}}^{\circ} = -92.99 \text{ cal mol}^{-1} \cdot \text{K}^{-1}.$$

$$\Delta H_{\text{duplex}}^{\circ} = -39.27 \text{ kcal mol}^{-1} \text{ and } \Delta S_{\text{duplex}}^{\circ} = -121.03 \text{ cal mol}^{-1} \cdot \text{K}^{-1}.$$

$$\Delta G_1^{\circ} = \Delta G_{\text{hairpin}}^{\circ} \text{ and } \Delta G_3^{\circ} = -\Delta G_{\text{duplex}}^{\circ}.$$

The free energy change from hairpin to duplex at 2 °C follows. This calculation assumes that all single strands form hairpin or duplex.

$$\Delta G_1^{\circ} + \Delta G_2^{\circ} + \Delta G_3^{\circ} = 0$$

$$\Delta G_2^{\circ} = -2\Delta G_1^{\circ} - \Delta G_3^{\circ}$$

$$\Delta G_2^{\circ} = 1436.26 \text{ cal mol}^{-1}$$

$$\Delta G_2^{\circ} = -RT \ln \left( \frac{[\text{duplex}]}{[\text{hairpin}]^2} \right)$$

$$\Delta G_2^{\circ} = -RT \ln \left( \frac{x/2}{(C_T - x)^2} \right)$$

Where  $x$  is the concentration of single-stranded RNA in duplex and  $C_T$  is the total concentration of strands. The concentration of duplex and hairpin are  $x/2$  and  $C_T - x$ , respectively. The value of  $x$  at 2 °C, with  $C_T = 4 \text{ mM}$ , is  $2.31 \times 10^{-6} \text{ M}$ . Therefore, the concentration of hairpin is approximately 4 mM. At  $C_T = 0.2 \text{ mM}$ ,  $x$  is  $5.78 \times 10^{-9} \text{ M}$ .

Therefore, the concentration of hairpin is approximately 0.2 mM.

---

Figure S6: Thermodynamics calculations with the nearest neighbor model showing that the 11-nt hairpin conformation is preferred to a duplex formed by self-dimerization of the RNA sequence.



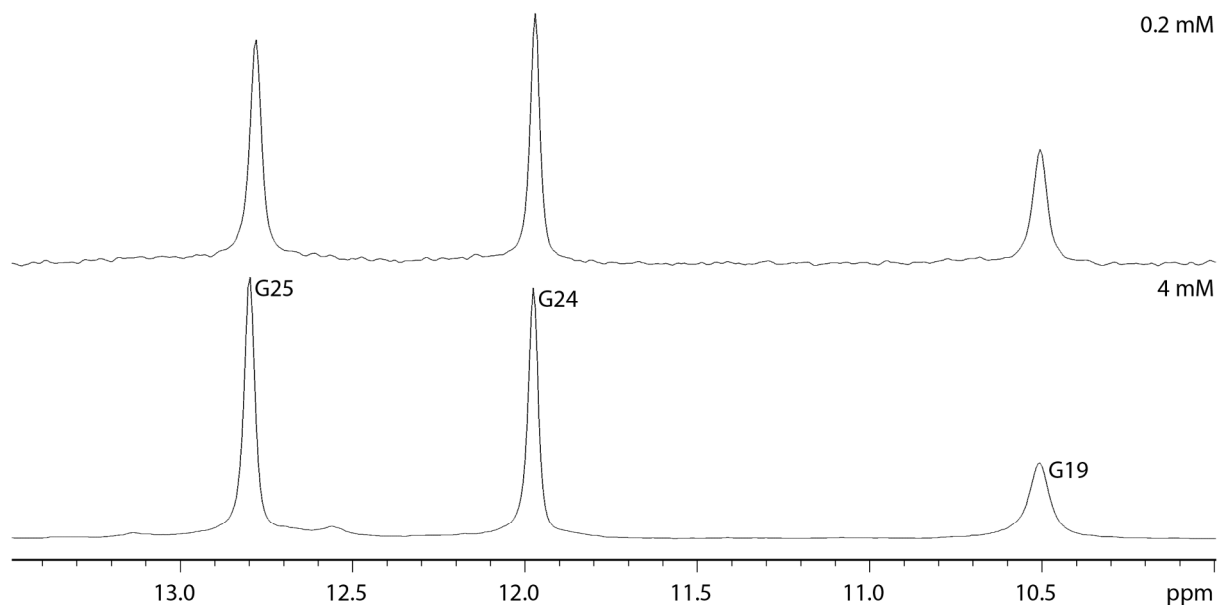

Figure S7: Imino proton region of the 11-nt hairpin at a strand concentration of 0.2 mM and 4 mM. The  $\text{Mg}^{2+}$  concentration was 0.25 mM and 5 mM for the 0.2 mM and 4 mM samples, respectively. The phosphates concentration was the same in the two samples. Spectra were acquired with a 1-1-echo pulse at 2 °C.

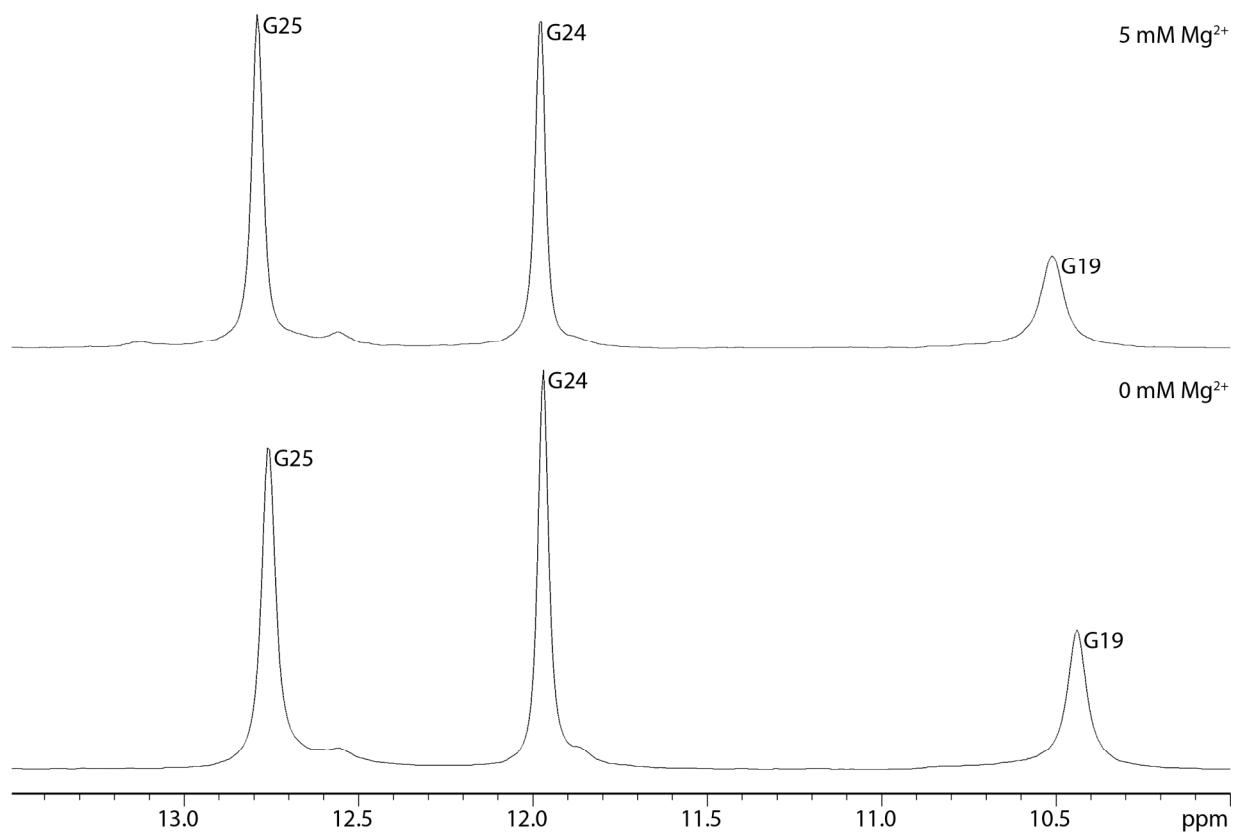

Figure S8: Imino region of 1D proton spectra of the 11-nt hairpin acquired with 0 and 5 mM  $\text{Mg}^{2+}$  at 5 °C.

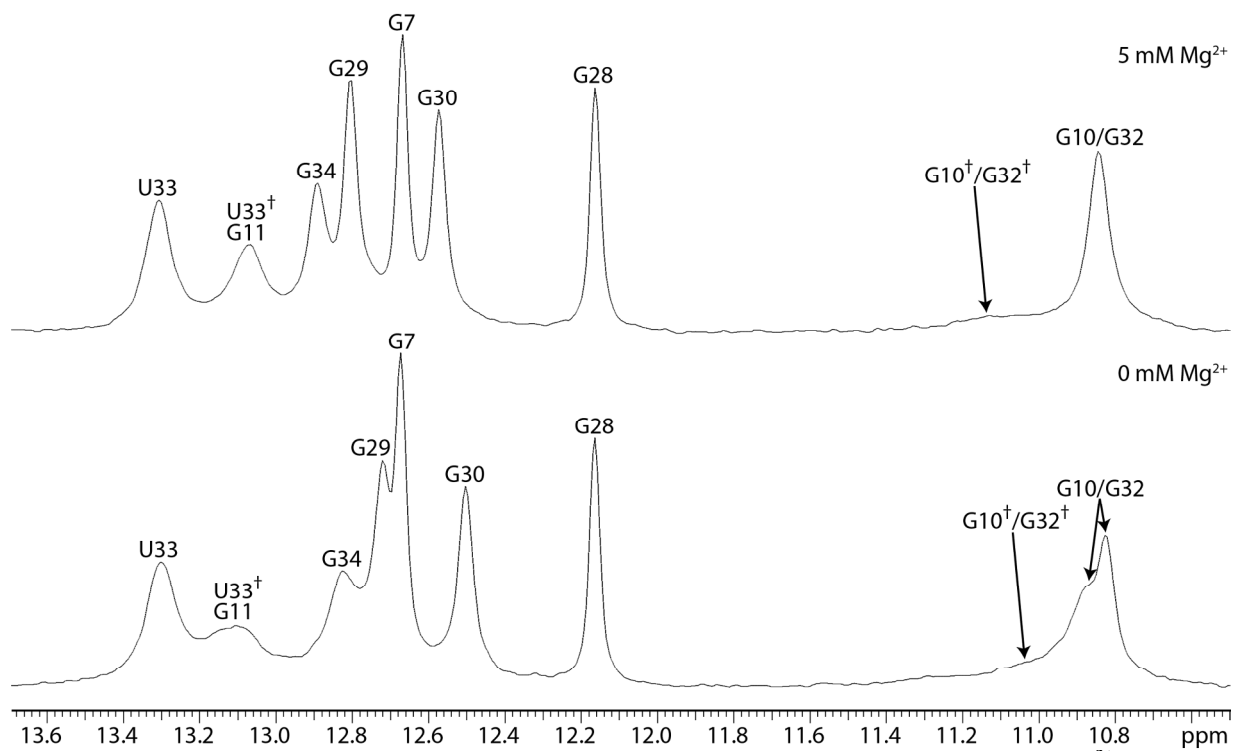

Figure S9: Imino region of 1D proton spectra of the 19-nt duplex acquired with 0 and 5 mM Mg<sup>2+</sup> at 5 °C. † Chemical exchange peak.

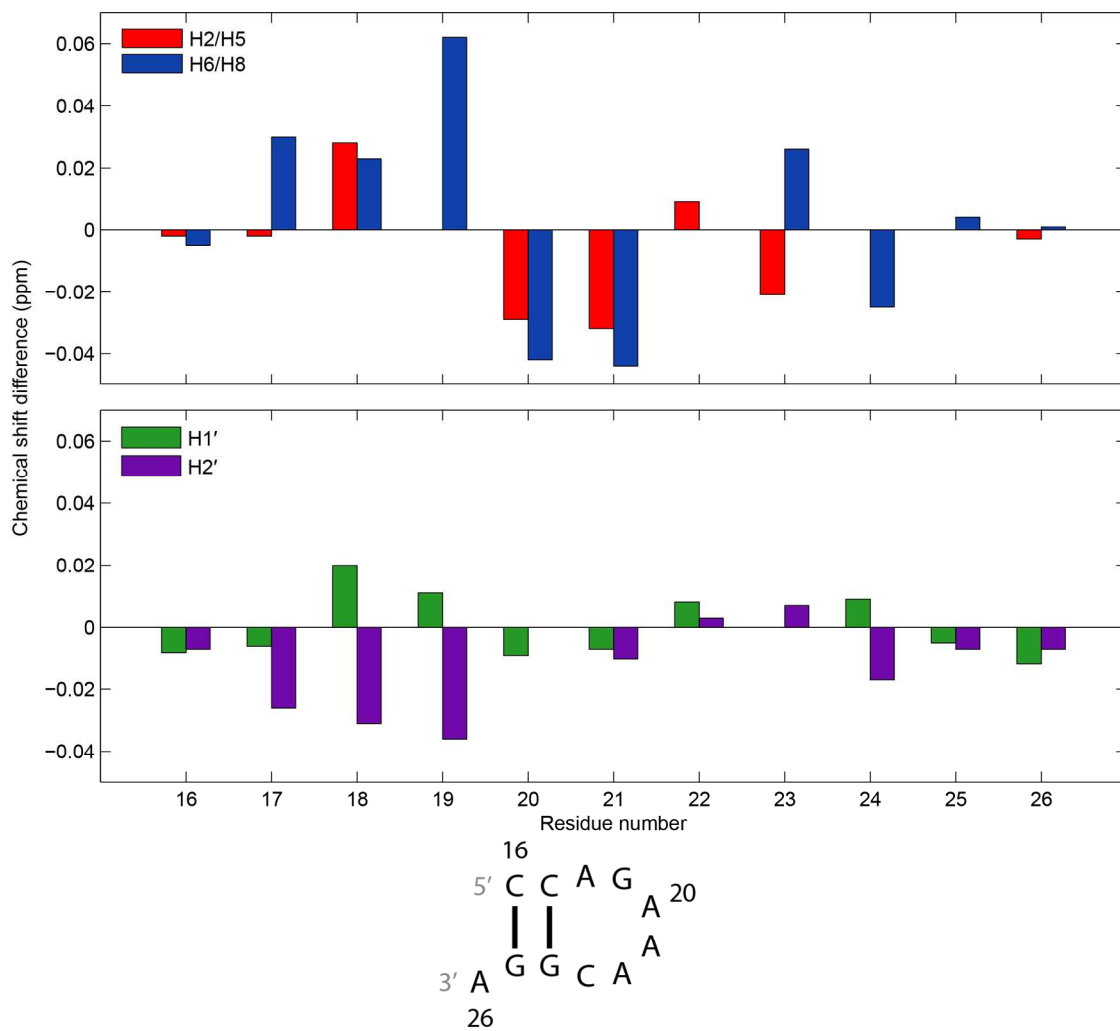

Figure S10: Differences in chemical shifts of select non-exchangeable hydrogens of the 11-nt hairpin with and without 5 mM  $Mg^{2+}$  at  $-2^{\circ}C$ . Residue numbers on the x-axis align with the middle of each set of two bars in each plot.

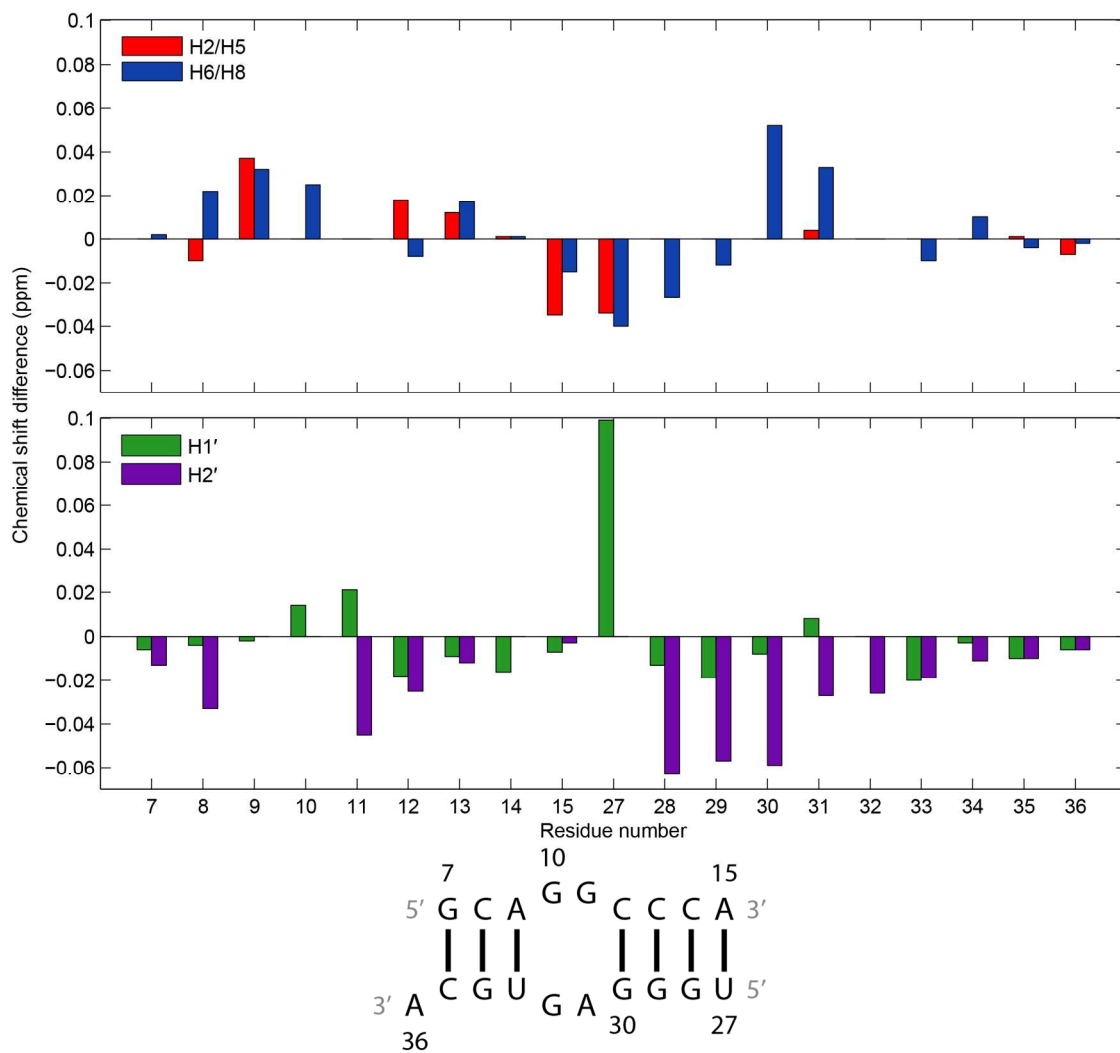

Figure S11: Differences in chemical shifts of select non-exchangeable hydrogens of the 19-nt duplex with and without 5 mM  $Mg^{2+}$  at  $-2^{\circ}C$ . Residue numbers on the x-axis align with the middle of each set of two bars in each plot.

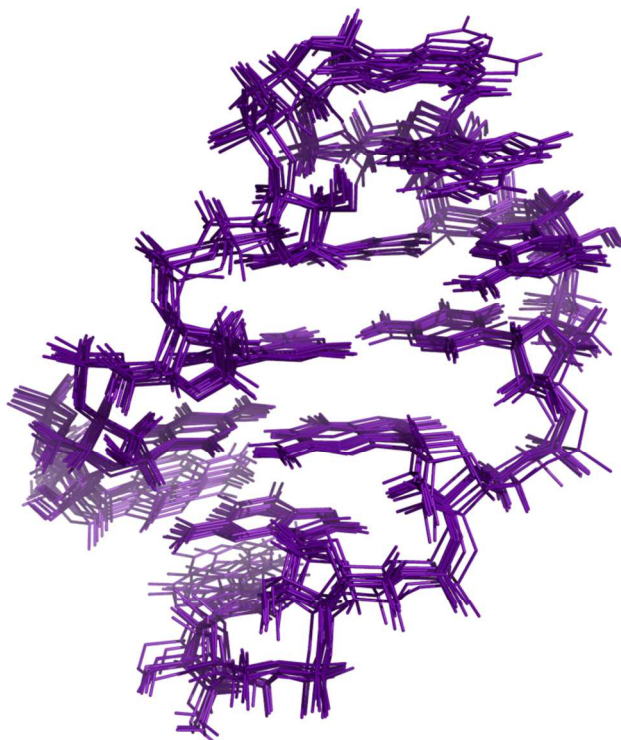

Figure S12: The ensemble of the 10 structures of the 11-nt hairpin modeled in AMBER with the lowest distance restraint violation energies and which agreed with NMR restraints.

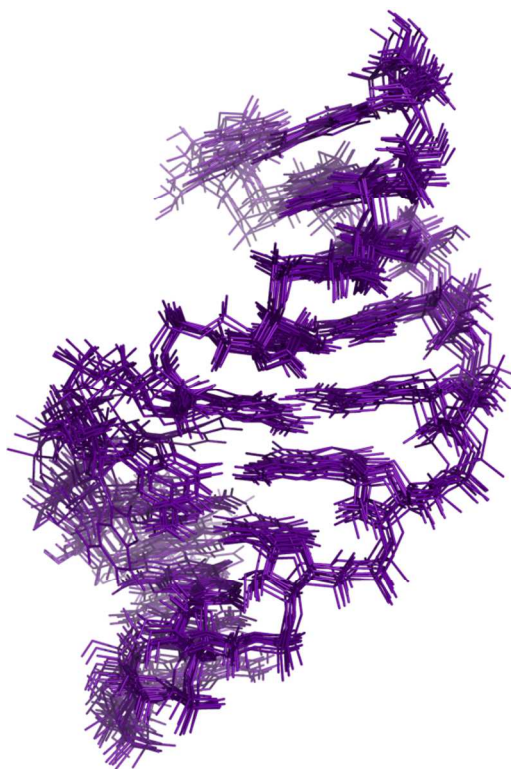

Figure S13: The ensemble of the 10 structures of the 19-nt duplex modeled in AMBER with the lowest distance restraint violation energies and which agreed with NMR restraints.

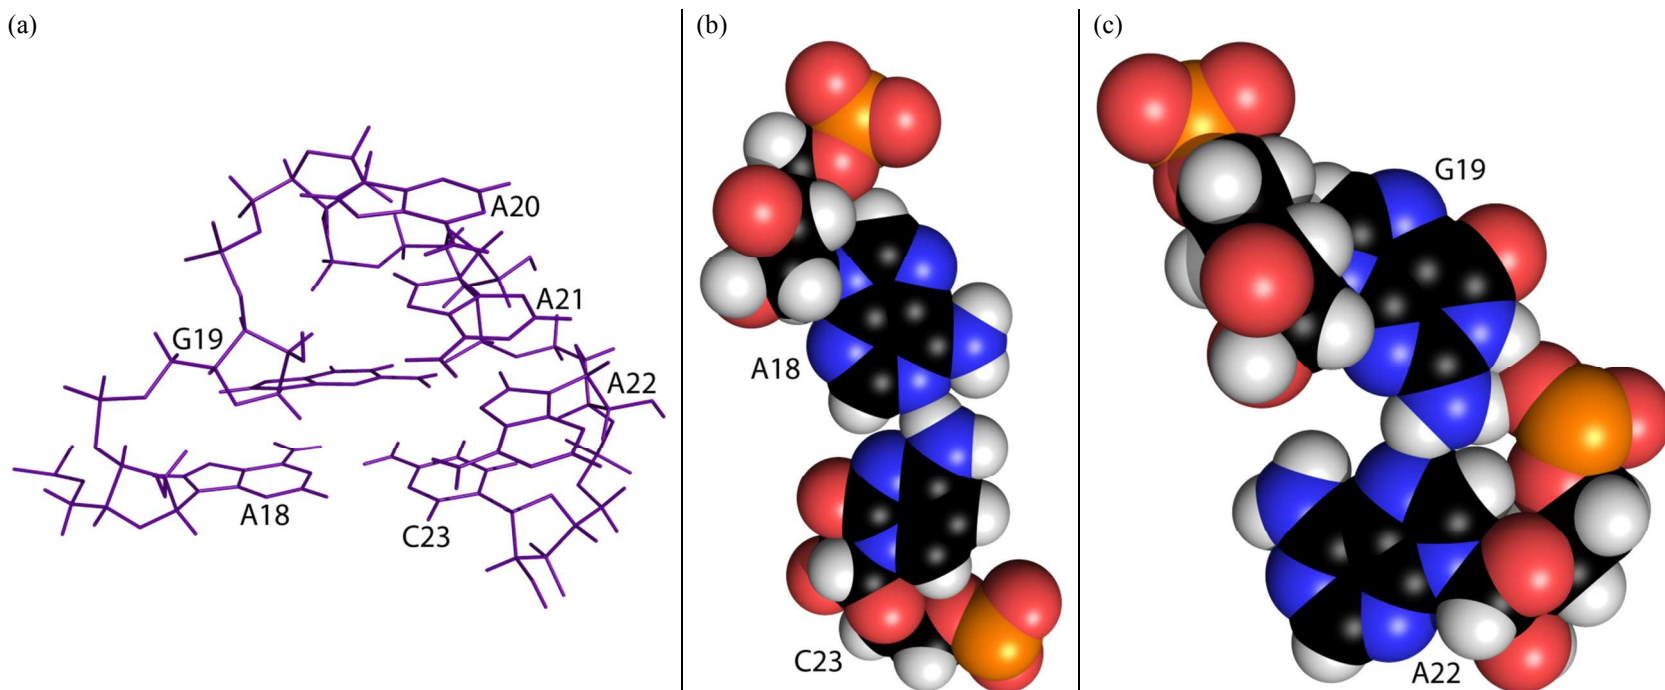

Figure S14: Calculated structure of the hairpin loop of the 11-nt hairpin construct. (a) Model of the GAAA loop and closing AC pair of the 11-nt hairpin construct calculated by AMBER, showing the 3' A<sub>3</sub> stack and an AC pair with a hydrogen bond from the C23 amino group to A18N1. (b) Space-filling model of the A18-C23 pair. (c) Space-filling model of the G19-A22 pair.

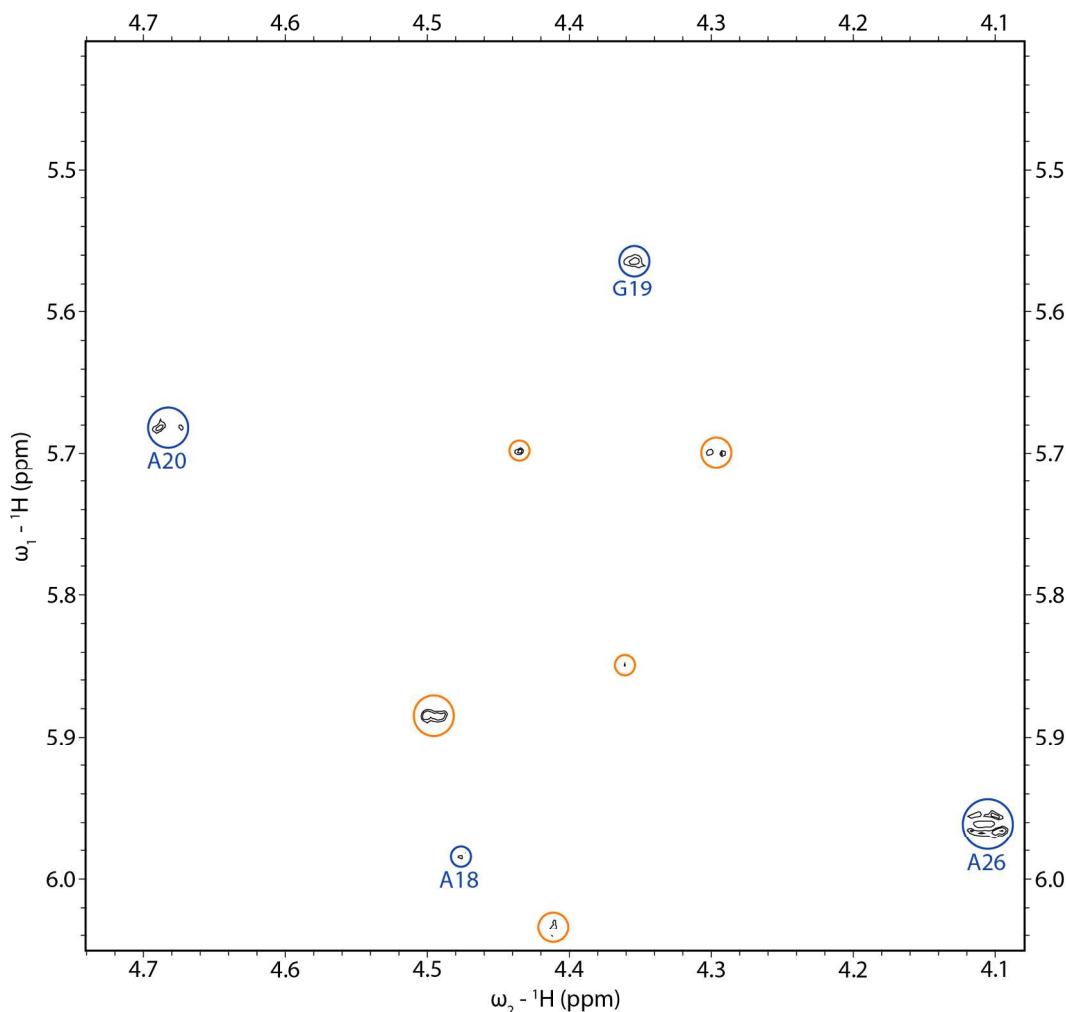

Figure S15: H1' to H2' region of a 2D TOCSY spectrum of the 11-nt hairpin. All visible cross-peaks are circled. Cross-peaks circled blue correspond to H1' to H2' cross-peaks for residues labeled with the same color. Cross-peaks circled orange are unassigned artifacts. As expected, the 3' terminal A26 residue has a relatively large H1' to H2' cross-peak. All H1' to H2' cross-peaks are small compared to C or U H5 to H6 cross-peaks in the same spectrum (not shown), indicating weak coupling between these protons and that all residues primarily have a C3' endo sugar pucker. The spectrum was acquired at 20 °C in D<sub>2</sub>O and 5 mM Mg<sup>2+</sup>.

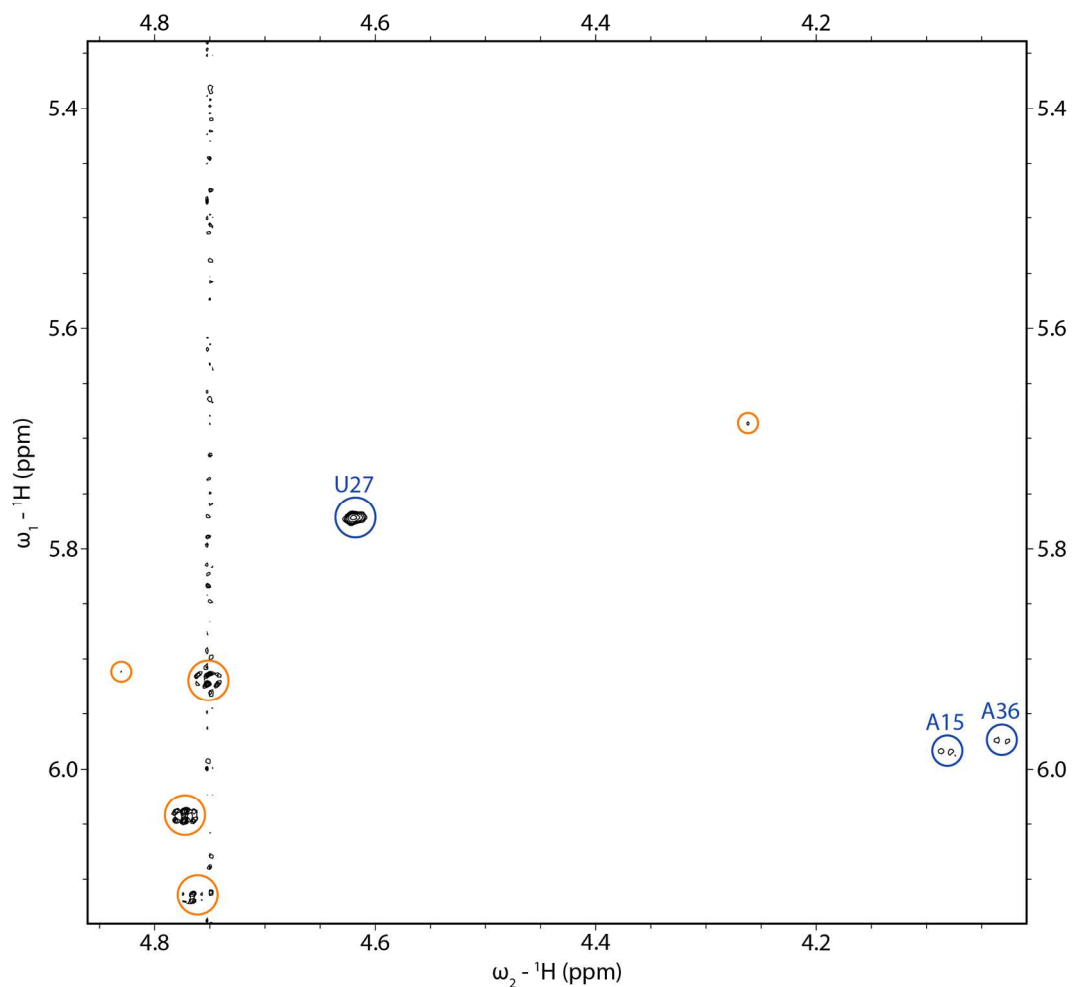

Figure S16: H1' to H2' region of a 2D TOCSY spectrum of the 19-nt duplex. All visible cross-peaks are circled. Cross-peaks circled blue correspond to H1' to H2' cross-peaks for residues labeled with the same color. Cross-peaks circled orange are unassigned artifacts. As expected, terminal residues have a relatively large H1' to H2' cross-peak. All H1' to H2' cross-peaks are small compared to C or U H5 to H6 cross-peaks in the same spectrum (not shown), indicating weak coupling between these protons and that all residues primarily have a C3' endo sugar pucker. The noise at 4.75 ppm is the residual water peak. The spectrum was acquired at 25 °C in D<sub>2</sub>O and 5 mM Mg<sup>2+</sup>.



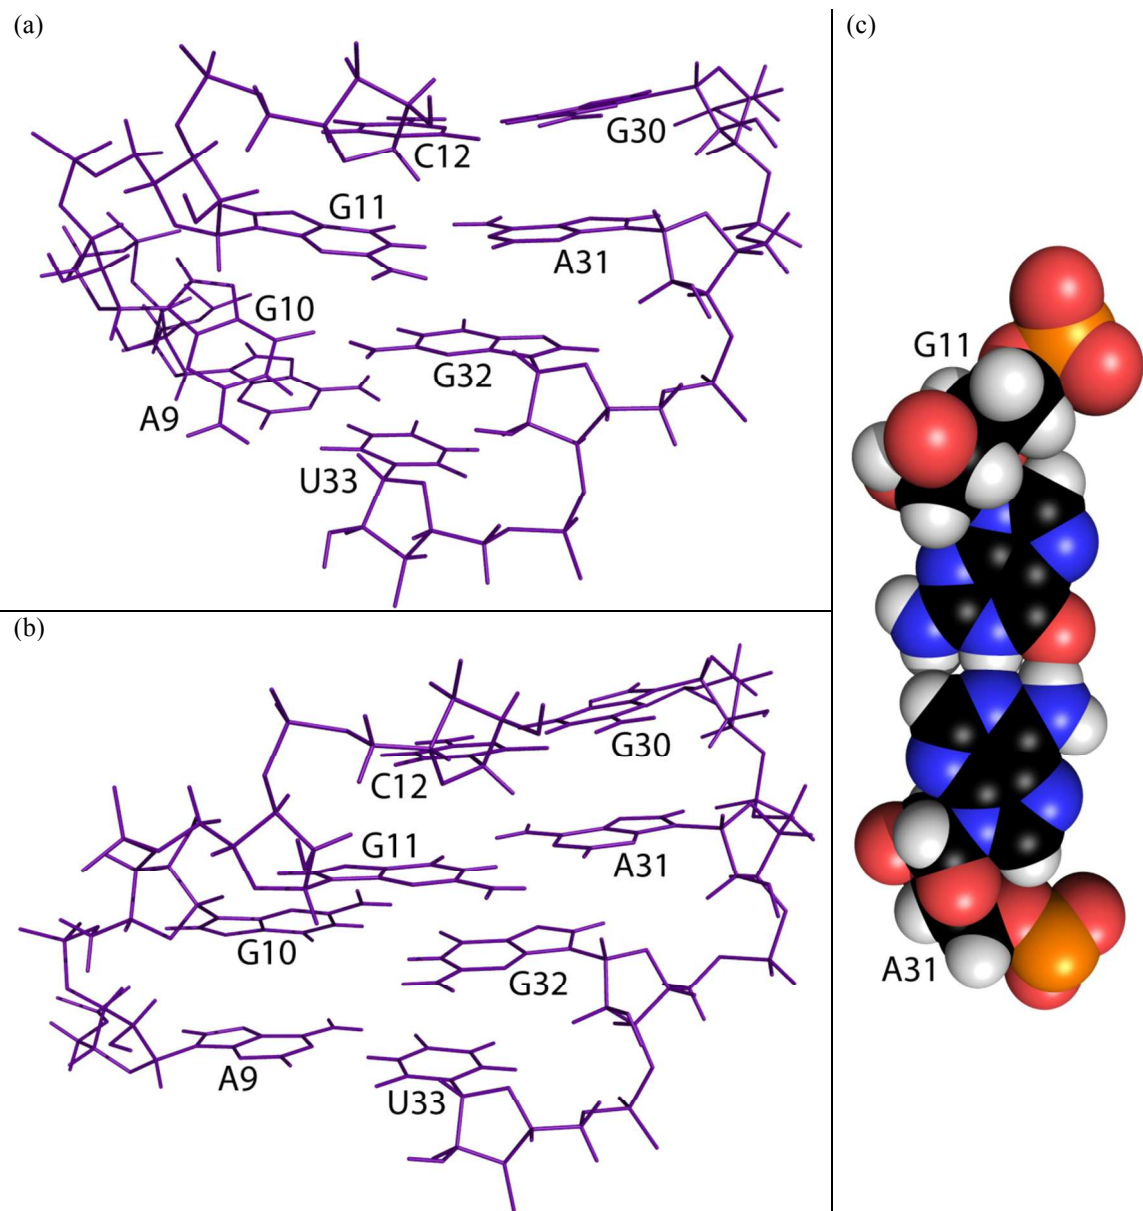

Figure S17: Calculated structure of the internal loop of the 19-nt duplex construct. (a) G10 is stacked below G11 with an *anti* conformation. (b) G10 flipped out of the helix with an *anti* conformation. (c) Space-filling model of the G11-A31 pair.

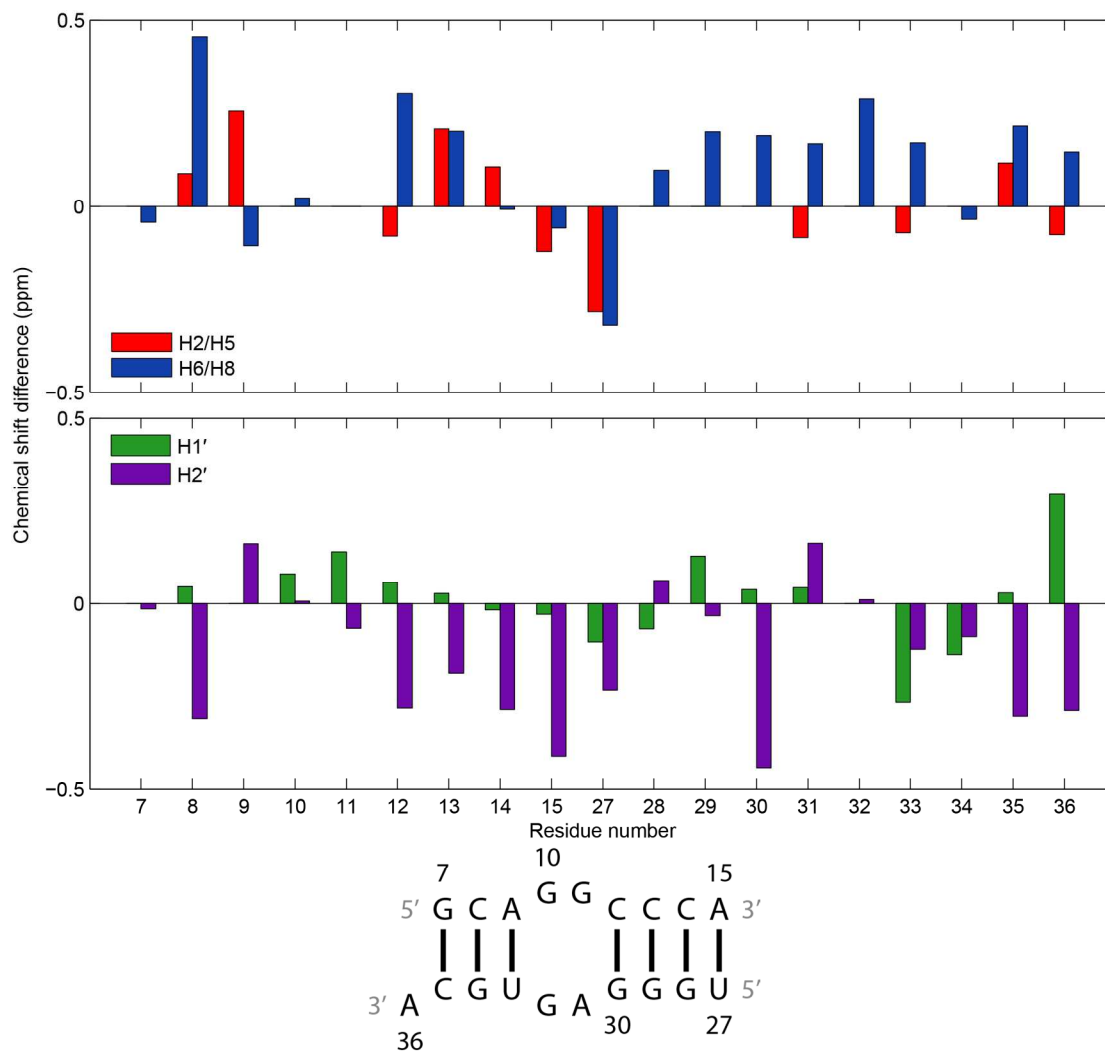

Figure S18: Chemical shift differences of the 19-nt duplex between experiment, assigned at 25 °C in the presence of 5 mM  $Mg^{2+}$ , and those predicted by NUCHEMICS for H2/H5, H6/H8, H1' and H2' in an ensemble of 20 structures generated with NMR restraints. Residue numbers on the x-axis align with the middle of each set of two bars in each plot.

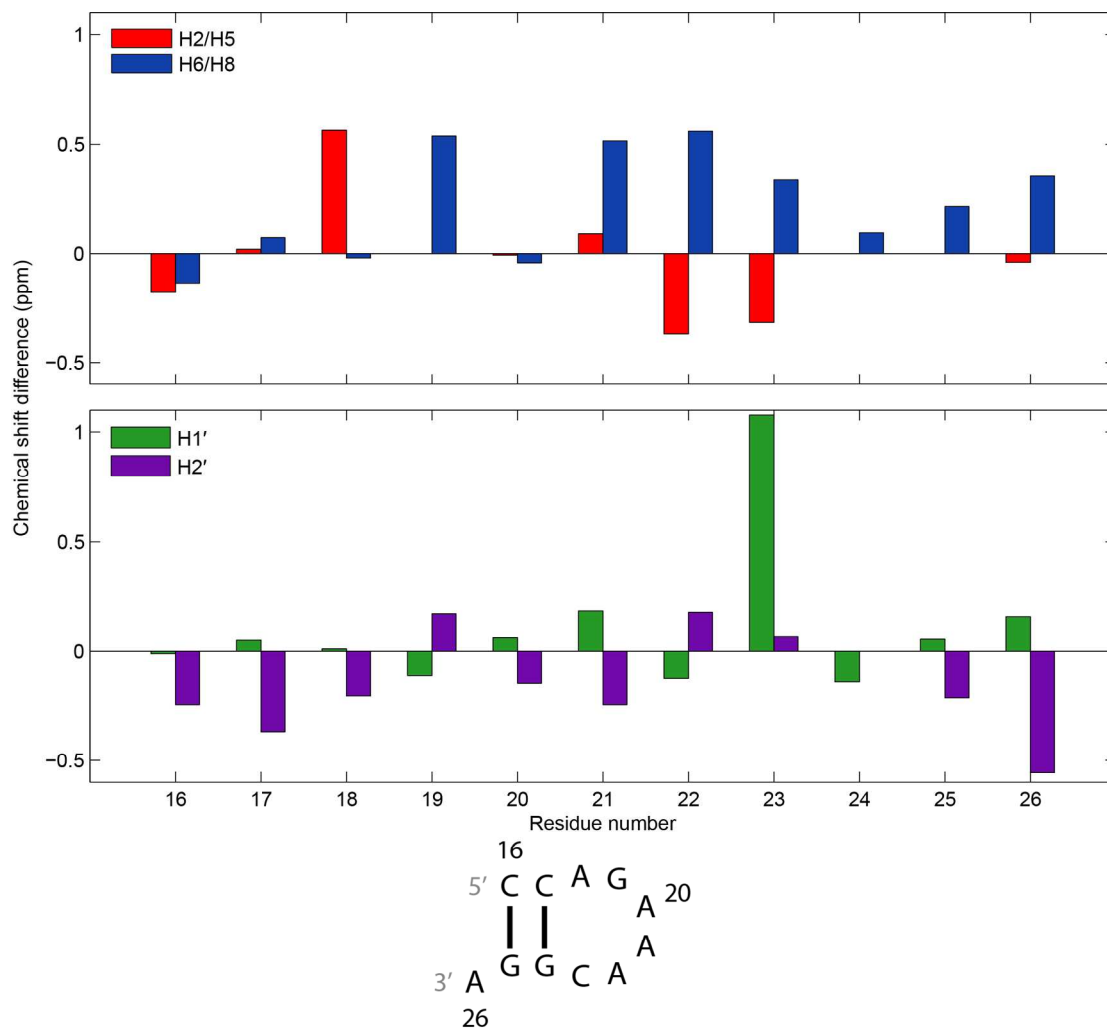

Figure S19: Chemical shift differences of the 11-nt hairpin between experiment, assigned at 20 °C in the presence of 5 mM Mg<sup>2+</sup>, and those predicted by NUCHEMICS for H2/H5, H6/H8, H1' and H2' in an ensemble of 20 structures generated with NMR restraints. Residue numbers on the x-axis align with the middle of each set of two bars in each plot.

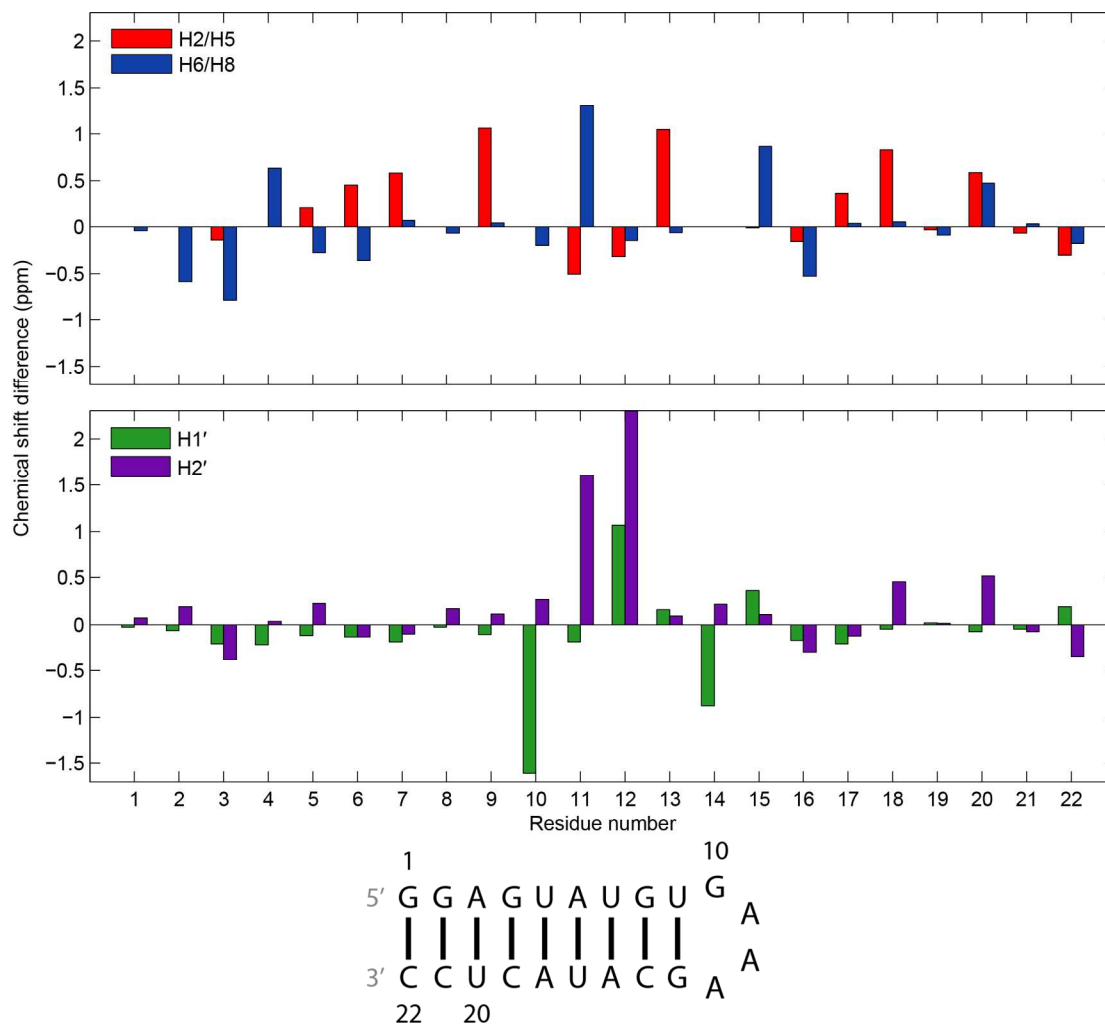

Figure S20: Differences between experimental and NUCHEMICS-predicted chemical shifts of a GAAA hairpin, closed by a GU pair, which consists of a helical region of a group II intron. Residue numbers on the x-axis align with the middle of each set of two bars in each plot. Experimental chemical shifts were obtained from BMRB entry 15859 and 3D structures were obtained from PDB entry 2K66.<sup>3</sup>

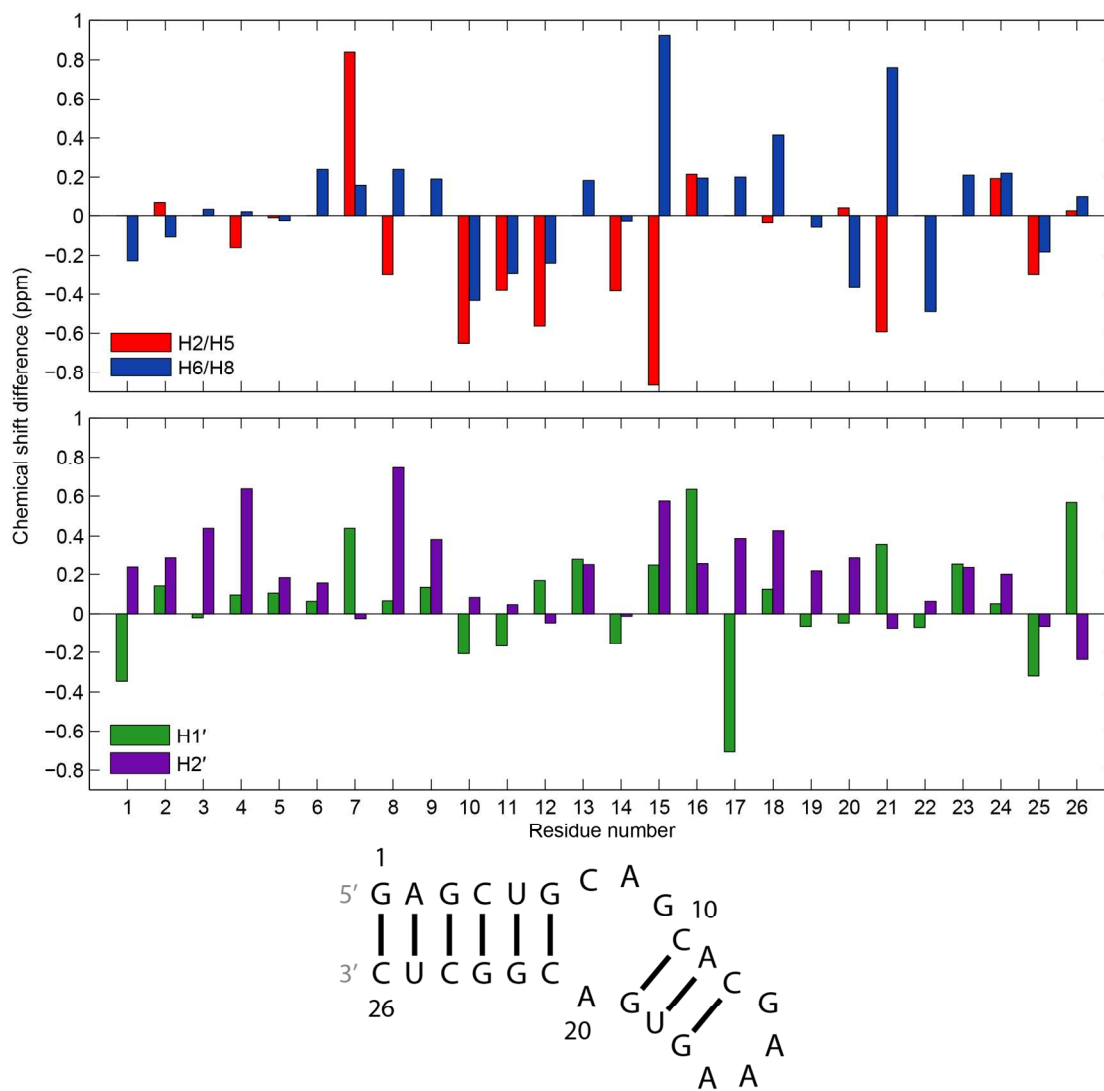

Figure S21: Differences between experimental and NUCHEMICS-predicted chemical shifts of a GAAA hairpin, closed by a GC pair, which contains an internal loop from a ribozyme. Residue numbers on the x-axis align with the middle of each set of two bars in each plot. Experimental chemical shifts were obtained from BMRB entry 17292 and 3D structures were obtained from PDB entry 2L5Z.<sup>4</sup>

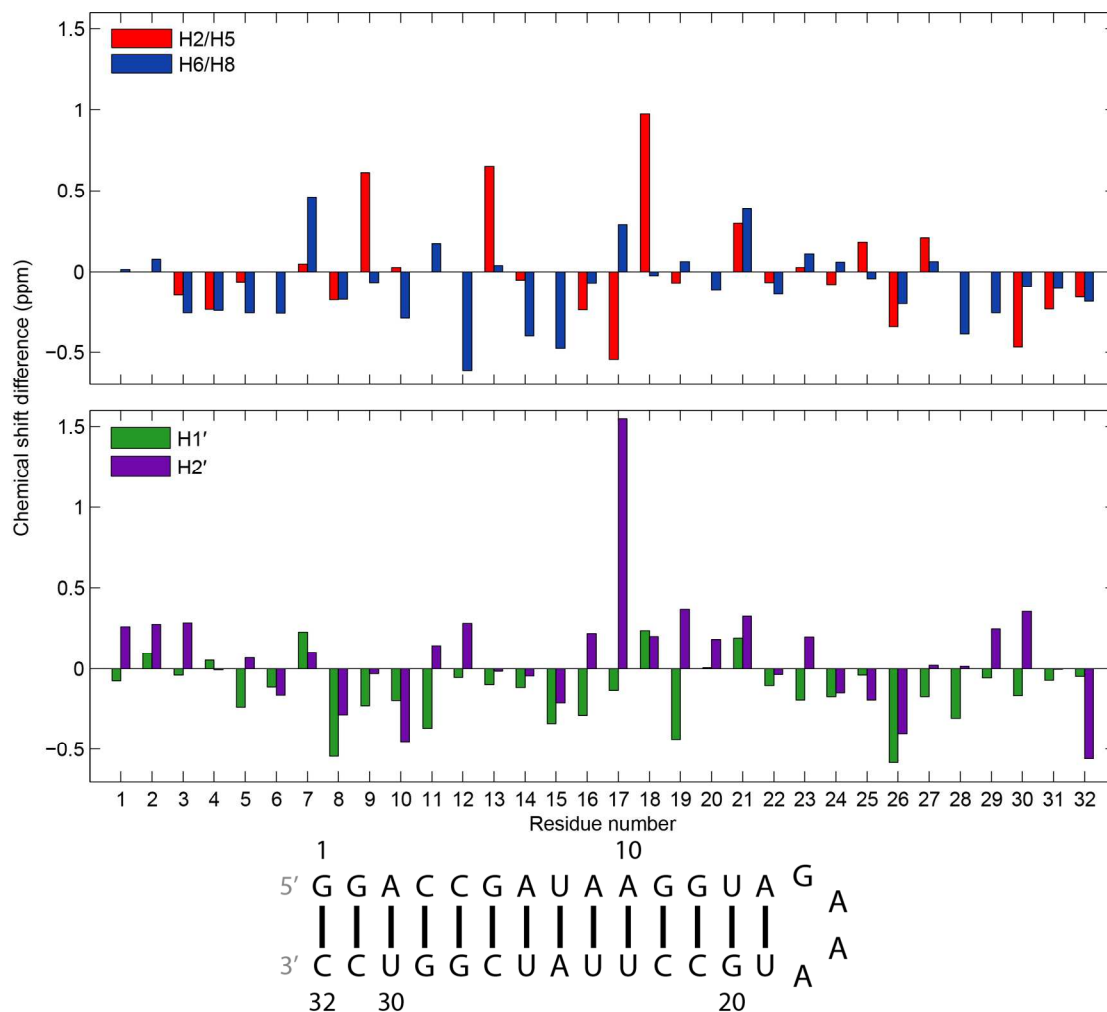

Figure S22: Differences between experimental and NUCHEMICS-predicted chemical shifts of a GAAA hairpin, closed by an AU pair, which consists of a helical region of a ribozyme. Residue numbers on the x-axis align with the middle of each set of two bars in each plot. Experimental chemical shifts were obtained from BMRB entry 17877 and 3D structures were obtained from PDB entry 2LI4.<sup>5</sup>

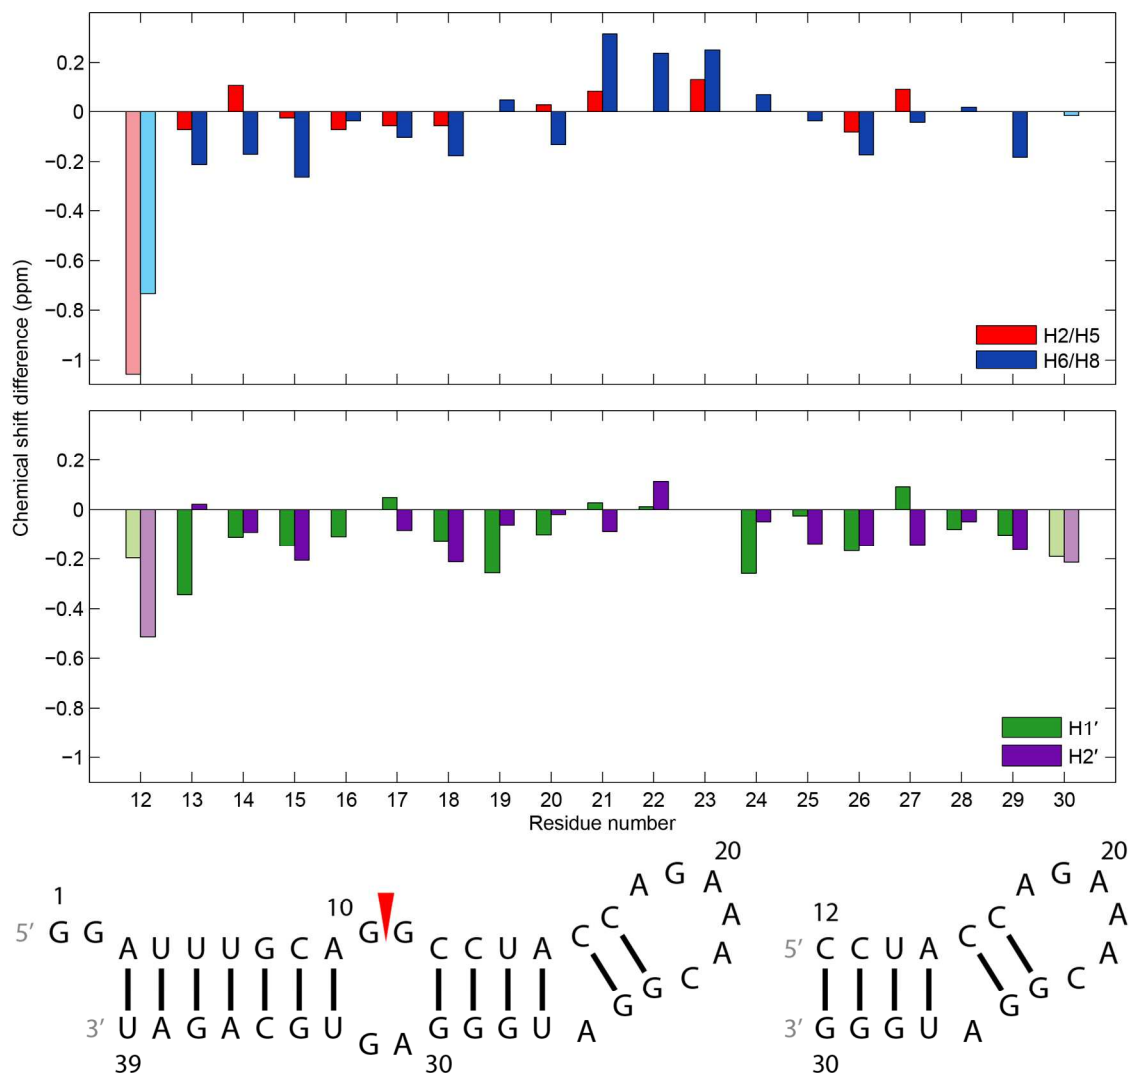

Figure S23: Differences between experimental chemical shifts of the 39-nt hairpin, assigned at 20 °C, and those predicted by NUCHEMICS for H2/H5, H6/H8, H1' and H2' in an ensemble of 20 structures of the 19-nt hairpin generated by CS-ROSETTA with chemical shift restraints. Bars colored with light shades belong to terminal helix residues 12 and 30 of the 19-mer that are not at the termini of any helices of the 39-mer, and thus are in structurally inequivalent regions among the constructs. Residue numbers on the x-axis align with the middle of each set of two bars in each plot.

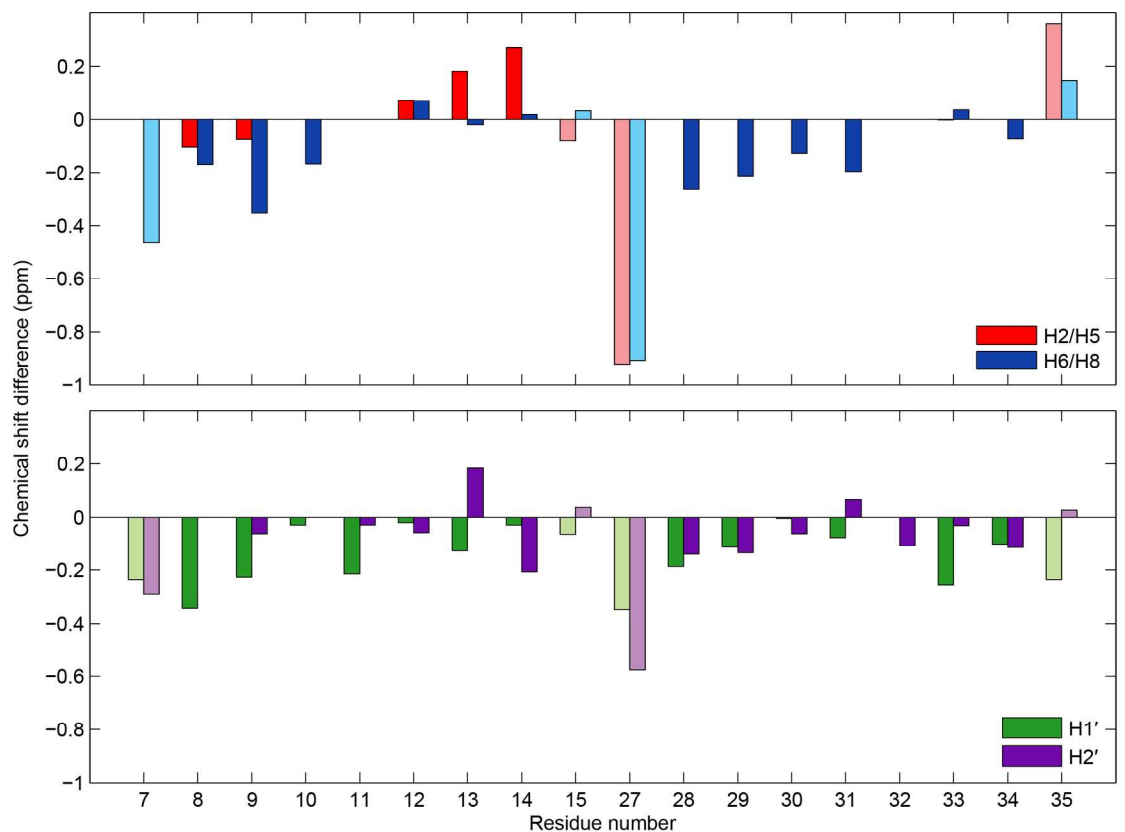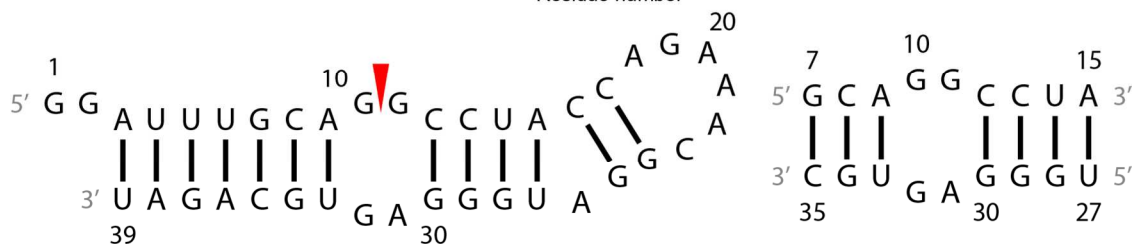

Figure S24: Differences between experimental chemical shifts of the 39-nt hairpin, assigned at 20 °C, and those predicted by NUCHEMICS for H2/H5, H6/H8, H1' and H2' in an ensemble of 20 structures of the 18-nt duplex generated by CS-ROSETTA with chemical shift restraints. Bars colored with light shades belong to terminal helix residues 7, 15, 27 and 35 of the 18-mer that are not at the termini of any helices of the 39-mer, and thus are in structurally inequivalent regions among the constructs. Residue numbers on the x-axis align with the middle of each set of two bars in each plot.

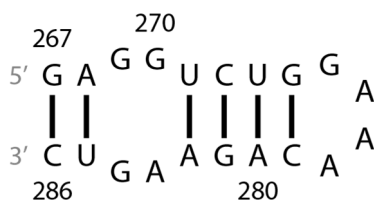

Figure S25: Secondary structure of a hairpin with a 2 × 2 internal loop from a group II intron of *Oceanobacillus ihyensii*.<sup>6</sup>



Table S1: Chemical shifts used to model fragments of the segment 7 hairpin with CS-ROSETTA. Chemical shifts were taken from spectra of the 39-nt hairpin (red), 19-nt duplex (blue) and 11-nt hairpin (green) at 20 °C (39-nt hairpin and 11-nt hairpin) or 25 °C (19-nt duplex) unless otherwise noted. The spectra for the 39-nt hairpin were acquired with no Mg<sup>2+</sup> and those for the 19-nt duplex and 11-nt hairpin were acquired with 5 mM Mg<sup>2+</sup>.

| Residue | Atom | Chemical shift (ppm) | Residue | Atom | Chemical shift (ppm) | Residue | Atom | Chemical Shift (ppm) |
|---------|------|----------------------|---------|------|----------------------|---------|------|----------------------|
| G7      | H1'  | 5.681                | C17     | H2'  | 4.178                | U27     | H2'  | 4.401                |
| G7      | H2'  | 4.415                | C17     | H5   | 5.365                | U27     | H5   | 5.262                |
| G7      | H8   | 7.677                | C17     | H6   | 7.596                | U27     | H6   | 7.479                |
| C8      | H1'  | 5.504                | A18     | H1'  | 5.980                | G28     | H1'  | 5.769                |
| C8      | H2'  | 4.316                | A18     | H2   | 7.670                | G28     | H2'  | 4.719                |
| C8      | H3'  | 4.605                | A18     | H2'  | 4.474                | G28     | H8   | 7.700                |
| C8      | H4'  | 4.461                | A18     | H3'  | 4.848                | G29     | H1'  | 5.745                |
| C8      | H5   | 5.273                | A18     | H8   | 8.184                | G29     | H2'  | 4.560                |
| C8      | H6   | 7.835                | G19     | H1'  | 5.563                | G29     | H3'  | 4.504                |
| A9      | H1'  | 5.878                | G19     | H2'  | 4.352                | G29     | H4'  | 4.507                |
| A9      | H2   | 7.198                | G19     | H3'  | 4.607                | G29     | H8   | 7.329                |
| A9      | H2'  | 4.491                | G19     | H4'  | 4.366                | G30     | H1'  | 5.660                |
| A9      | H3'  | 4.852                | G19     | H8   | 7.335                | G30     | H2'  | 4.169                |
| A9      | H4'  | 4.391                | A20     | H1'  | 5.681                | G30     | H3'  | 4.647                |
| A9      | H8   | 8.045                | A20     | H2   | 7.726                | G30     | H4'  | 4.420                |
| G10     | H1'  | 6.038                | A20     | H2'  | 4.680                | G30     | H8   | 7.264                |
| G10     | H2'  | 4.500                | A20     | H3'  | 4.475                | A31     | H1'  | 6.104                |
| G10     | H3'  | 4.716                | A20     | H4'  | 4.250                | A31     | H2   | 7.948                |
| G10     | H4'  | 4.491                | A20     | H8   | 8.210                | A31     | H2'  | 4.842                |
| G10     | H8   | 7.679                | A21     | H1'  | 5.515                | A31     | H3'  | 4.678                |
| G11     | H1'  | 5.567                | A21     | H2   | 7.610                | A31     | H4'  | 4.480                |
| G11     | H2'  | 4.583                | A21     | H2'  | 4.558                | A31     | H8   | 8.078                |
| G11     | H3'  | 4.353                | A21     | H3'  | 4.655                | G32     | H1'  | 5.370 <sup>a</sup>   |
| G11     | H8   | 7.369 <sup>a</sup>   | A21     | H4'  | 4.410                | G32     | H2'  | 4.358                |
| C12     | H1'  | 5.523                | A21     | H8   | 7.888                | G32     | H3'  | 4.229                |
| C12     | H2'  | 4.239                | A22     | H1'  | 5.850                | G32     | H8   | 7.100                |
| C12     | H3'  | 4.451                | A22     | H2   | 8.082                | U33     | H1'  | 5.518                |
| C12     | H5   | 5.208                | A22     | H2'  | 4.675                | U33     | H2'  | 4.600                |
| C12     | H6   | 7.512                | A22     | H3'  | 4.620                | U33     | H3'  | 4.533                |
| C13     | H1'  | 5.367                | A22     | H4'  | 4.468                | U33     | H4'  | 4.422                |
| C13     | H2'  | 4.290                | A22     | H8   | 7.930                | U33     | H5   | 5.040                |
| C13     | H3'  | 4.485                | C23     | H1'  | 4.850                | U33     | H6   | 7.732                |
| C13     | H4'  | 4.363                | C23     | H2'  | 4.414                | G34     | H1'  | 5.745                |
| C13     | H5   | 5.423                | C23     | H3'  | 4.338                | G34     | H2'  | 4.415                |
| C13     | H6   | 7.837                | C23     | H5   | 5.583                | G34     | H3'  | 4.558                |
| U14     | H1'  | 5.516                | C23     | H6   | 7.730                | G34     | H4'  | 4.435                |
| U14     | H2'  | 4.252                | G24     | H1'  | 5.528                | G34     | H8   | 7.693                |
| U14     | H5   | 5.736                | G24     | H2'  | 4.698                | C35     | H1'  | 5.357                |
| U14     | H6   | 7.802                | G24     | H8   | 7.596                | C35     | H2'  | 4.303                |
| A15     | H1'  | 5.939                | G25     | H1'  | 5.640                | C35     | H3'  | 4.370                |
| A15     | H2   | 7.417                | G25     | H2'  | 4.391                | C35     | H4'  | 4.330                |
| A15     | H2'  | 4.519                | G25     | H3'  | 4.564                | C35     | H5   | 5.170                |
| A15     | H3'  | 4.613                | G25     | H8   | 7.307                | C35     | H6   | 7.438                |
| A15     | H8   | 8.250                | A26     | H1'  | 5.924                |         |      |                      |
| C16     | H1'  | 5.139                | A26     | H2   | 7.960                |         |      |                      |
| C16     | H5   | 5.360                | A26     | H2'  | 4.387                |         |      |                      |
| C16     | H6   | 7.421                | A26     | H8   | 8.036                |         |      |                      |
| C17     | H1'  | 5.302                | U27     | H1'  | 5.598                |         |      |                      |

<sup>a</sup> Assigned at -2 °C.

Table S2: Assigned chemical shifts of the 39-nt 3' splice site segment 7 hairpin construct.

| Residue | H1'  | H2'  | H2/H5 | H6/H8 | H1/H3                    | H21/41/61, H22/42/62<br>amino |
|---------|------|------|-------|-------|--------------------------|-------------------------------|
| G2      | 5.78 | 4.76 | N/A   | 7.89  | -                        | -                             |
| A3      | 5.88 | 4.71 | 7.88  | 8.38  | N/A                      | -                             |
| U4      | 5.54 | 4.56 | 5.14  | 7.60  | 14.14                    | N/A                           |
| U5      | 5.48 | -    | 5.51  | 7.93  | 11.92                    | N/A                           |
| U6      | 5.47 | 4.56 | 5.53  | 7.94  | 13.51                    | N/A                           |
| G7      | 5.68 | 4.42 | N/A   | 7.68  | 12.41                    | 6.25                          |
| C8      | 5.32 | -    | 5.17  | 7.61  | N/A                      | 8.28, 6.87                    |
| A9      | 5.78 | 4.47 | 7.06  | 7.90  | N/A                      | -                             |
| G10     | 5.88 | -    | N/A   | 7.60  | 10.79 <sup>a</sup>       | -                             |
| G11     | 5.51 | 4.58 | N/A   | -     | 13.08                    | 5.88                          |
| C12     | 5.52 | 4.26 | 5.13  | 7.50  | N/A                      | 8.42, 6.98                    |
| C13     | 5.35 | 4.51 | 5.37  | 7.67  | N/A                      | 8.22, 6.91                    |
| U14     | 5.52 | 4.25 | 5.74  | 7.80  | 11.66                    | N/A                           |
| A15     | 5.94 | 4.52 | 7.42  | 8.25  | N/A                      | -                             |
| C16     | 5.14 | -    | 5.36  | 7.42  | N/A                      | 8.10, 6.92 <sup>b</sup>       |
| C17     | 5.30 | 4.18 | 5.37  | 7.60  | N/A                      | 8.22, 6.93                    |
| A18     | 5.82 | 4.36 | 7.43  | 8.00  | N/A                      | -                             |
| G19     | 5.45 | 4.36 | N/A   | 7.34  | 10.46                    | 7.02                          |
| A20     | 5.67 | 4.62 | 7.78  | 8.16  | N/A                      | -                             |
| A21     | 5.57 | 4.55 | 7.73  | 7.96  | N/A                      | -                             |
| A22     | 5.81 | 4.64 | -     | 7.98  | N/A                      | -                             |
| C23     | -    | -    | 5.60  | 7.64  | N/A                      | -                             |
| G24     | 5.53 | 4.70 | N/A   | 7.60  | 11.92                    | -                             |
| G25     | 5.64 | 4.39 | N/A   | 7.31  | 12.41 <sup>b</sup>       | -                             |
| A26     | 5.92 | 4.39 | 7.96  | 8.04  | N/A                      | -                             |
| U27     | 5.60 | 4.40 | 5.26  | 7.48  | 12.23                    | N/A                           |
| G28     | 5.77 | 4.72 | N/A   | 7.70  | 10.30                    | 6.30                          |
| G29     | 5.62 | 4.51 | N/A   | 7.10  | 12.70                    | 6.17 <sup>b</sup>             |
| G30     | 5.65 | 4.23 | N/A   | 7.16  | 12.49                    | -                             |
| A31     | 6.06 | 4.86 | -     | 8.03  | N/A                      | -                             |
| G32     | -    | 4.37 | N/A   | -     | 10.79 <sup>a</sup>       | -                             |
| U33     | 5.49 | 4.60 | 4.99  | 7.68  | 13.39                    | N/A                           |
| G34     | 5.71 | 4.37 | N/A   | 7.68  | 12.69/12.41 <sup>c</sup> | -                             |
| C35     | 5.32 | 4.36 | 5.19  | 7.61  | N/A                      | 8.31, 6.86                    |
| A36     | 5.91 | 4.59 | 6.81  | 7.92  | N/A                      | -                             |
| G37     | 5.48 | 4.61 | N/A   | 6.87  | 10.67                    | 6.34                          |
| A38     | 5.89 | 4.34 | 7.88  | 7.71  | N/A                      | -                             |
| U39     | 5.71 | 4.10 | 5.08  | 7.45  | 13.66                    | N/A                           |

Exchangeable proton chemical shifts were assigned in a  $-2$  °C spectrum. Non-exchangeable proton chemical shifts were assigned in a  $20$  °C spectrum. Exceptions are noted. <sup>a</sup> Ambiguous. <sup>b</sup> Assigned in a  $20$  °C spectrum. <sup>c</sup> Minor conformation.

Table S3: Assigned chemical shifts of the 11-nt hairpin construct.

| Residue | H1'  | H2'  | H3'  | H4'               | H5'  | H5'' | H2/H5 | H6/H8 | H1/H3 | H21/41/61,<br>H22/42/62<br>amino | P <sup>a</sup> |
|---------|------|------|------|-------------------|------|------|-------|-------|-------|----------------------------------|----------------|
| C16     | 5.62 | 4.50 | 4.46 | 4.40              | 4.12 | 3.94 | 6.04  | 8.13  | N/A   | 8.55, 7.10                       |                |
| C17     | 5.43 | 4.28 | 4.68 | 4.41              | 4.58 | 4.16 | 5.53  | 7.82  | N/A   | 8.49, 6.93                       | -4.10          |
| A18     | 5.98 | 4.47 | 4.85 | -                 | 4.52 | 4.18 | 7.67  | 8.18  | N/A   | -                                | -3.98          |
| G19     | 5.56 | 4.35 | 4.61 | 4.37              | 4.42 | 4.11 | N/A   | 7.34  | 10.49 | 7.16                             | -3.47          |
| A20     | 5.68 | 4.68 | 4.48 | 4.25              | 4.26 | 3.95 | 7.73  | 8.21  | N/A   | -                                | -2.12          |
| A21     | 5.52 | 4.56 | 4.66 | 4.41              | 4.30 | 4.02 | 7.61  | 7.89  | N/A   | -                                | -3.21          |
| A22     | 5.85 | 4.68 | 4.62 | 4.47              | 4.58 | 4.21 | 8.08  | 7.93  | N/A   | -                                | -4.16          |
| C23     | 4.85 | 4.41 | 4.34 | 4.30 <sup>a</sup> | 4.36 | 4.13 | 5.58  | 7.73  | N/A   | 7.72, 6.58                       | -3.95          |
| G24     | 5.59 | 4.72 | 4.33 | -                 | 4.25 | 4.10 | N/A   | 7.58  | 11.97 | 5.87, 7.39                       | -3.56          |
| G25     | 5.69 | 4.52 | 4.57 | 4.42              | 4.50 | 4.07 | N/A   | 7.30  | 12.80 | 8.18                             | -4.07          |
| A26     | 5.96 | 4.10 | 4.29 | 4.26              | 4.43 | 4.06 | 7.91  | 7.85  | N/A   | -                                | -3.86          |

Exchangeable proton chemical shifts were assigned in a  $-1$  °C spectrum in H<sub>2</sub>O. Non-exchangeable proton chemical shifts were assigned in a  $20$  °C spectrum in D<sub>2</sub>O. All chemical shifts were assigned in spectra obtained with  $5$  mM Mg<sup>2+</sup>. Exceptions are noted. <sup>a</sup> Assigned in a  $20$  °C spectrum without Mg<sup>2+</sup>.

Table S4: Assigned chemical shifts of the 19-nt duplex construct.

| Residue | H1'               | H2'  | H3'  | H4'  | H5'  | H5'' | H2/H5 | H6/H8             | H1/H3              | H21/41/61,<br>H22/42/62<br>amino | P     |
|---------|-------------------|------|------|------|------|------|-------|-------------------|--------------------|----------------------------------|-------|
| G7      | 5.87              | 4.79 | 4.56 | 4.44 | 4.13 | 3.95 | N/A   | 8.13              | 12.67              | -                                |       |
| C8      | 5.50              | 4.32 | 4.61 | 4.46 | -    | 4.17 | 5.27  | 7.84              | N/A                | 8.54, 6.82                       | -4.34 |
| A9      | 5.88              | 4.49 | 4.85 | 4.39 | -    | 4.19 | 7.20  | 8.05              | N/A                | -                                | -4.02 |
| G10     | 6.04              | 4.50 | 4.72 | 4.49 | -    | -    | N/A   | 7.68              | 10.86 <sup>a</sup> | -                                |       |
| G11     | 5.57              | 4.58 | 4.35 | -    | -    | -    | N/A   | 7.37 <sup>b</sup> | 13.08              | 5.91                             | -3.93 |
| C12     | 5.52              | 4.24 | 4.45 | -    | -    | 4.10 | 5.21  | 7.51              | N/A                | 8.47, 7.06                       | -4.49 |
| C13     | 5.37              | 4.29 | 4.49 | 4.36 | -    | 4.05 | 5.42  | 7.84              | N/A                | 8.42, 6.96                       | -4.54 |
| C14     | 5.41              | 4.32 | 4.47 | 4.34 | -    | 4.05 | 5.43  | 7.64              | N/A                | 8.25, 6.97                       | -4.07 |
| A15     | 5.98              | 4.08 | 4.31 | 4.24 | -    | 4.09 | 7.46  | 8.03              | N/A                | -                                | -3.94 |
| U27     | 5.77              | 4.62 | 4.63 | 4.37 | 4.00 | 3.90 | 5.85  | 8.01              | -                  | N/A                              |       |
| G28     | 5.91              | 4.79 | 4.69 | 4.56 | -    | -    | N/A   | 8.02              | 12.16              | -                                | -3.74 |
| G29     | 5.75              | 4.56 | 4.50 | 4.51 | 4.51 | 4.14 | N/A   | 7.33              | 12.81              | -                                | -3.69 |
| G30     | 5.66              | 4.17 | 4.65 | 4.42 | 4.54 | 4.09 | N/A   | 7.26              | 12.57              | -                                |       |
| A31     | 6.10              | 4.84 | 4.68 | 4.48 | -    | -    | 7.95  | 8.08              | N/A                | -                                |       |
| G32     | 5.37 <sup>b</sup> | 4.36 | 4.23 | -    | -    | -    | N/A   | 7.10              | 10.86 <sup>a</sup> | -                                | -4.00 |
| U33     | 5.52              | 4.60 | 4.53 | 4.42 | -    | 4.09 | 5.04  | 7.73              | 13.31              | N/A                              | -4.85 |
| G34     | 5.75              | 4.42 | 4.56 | 4.44 | -    | 4.11 | N/A   | 7.69              | 12.91              | -                                | -4.05 |
| C35     | 5.36              | 4.30 | 4.37 | 4.33 | -    | 4.04 | 5.17  | 7.44              | N/A                | 8.07, 6.91                       | -4.23 |
| A36     | 5.97              | 4.03 | 4.27 | 4.21 | 4.40 | 4.03 | 7.41  | 8.01              | N/A                | -                                | -3.85 |

Exchangeable proton chemical shifts were assigned in a  $0$  °C spectrum in H<sub>2</sub>O. Non-exchangeable proton and phosphorus chemical shifts were assigned in a  $25$  °C spectrum in D<sub>2</sub>O. All chemical shifts were assigned in spectra obtained with  $5$  mM Mg<sup>2+</sup>. Exceptions are noted. <sup>a</sup> Ambiguous. <sup>b</sup> Assigned in a  $-2$  °C spectrum.

## Plasmid insert design for *in vitro* transcription of the 39-nt 3' segment 7 mRNA hairpin by T7 RNA polymerase

Cloning vector: pUC18 (Fermentas)

Intended sequence of the 39-nt RNA hairpin:

5' GGAUUUGCAGGCCUACCAGAAACGGAUGGGAGUGCAGAU3'

Sequence of the insert:

5' GACGAAGCTTTAATACGACTCACTATAGGATTTGCAGGCCTACCAGAAACGGATGGGAGTGC  
AGATATCGAATTCGAGC3'

Reverse complement of the insert:

5' GCTCGAATTCGATATCTGCACTCCCATCCGTTTCTGGTAGGCCTGCAAATCCTATAGTGAGT  
CGTATTAAGCTTCGTC3'

Notation:

EcoR1 recognition sequence: 5' GAATTC3'

EcoRV recognition sequence: 5' GATATC3'<sup>a</sup>

HindIII recognition sequence: 5' AAGCTT3'

RNA hairpin sequence

T7 RNA polymerase promoter

<sup>a</sup> Bases that are part of the RNA hairpin sequence are labeled red.

## Distance restraints for AMBER modeling of 39-nt hairpin

```
assign (residue 17 and name H1' ) (residue 17 and name H6 ) 4.00 0.84 1.04 !
assign (residue 17 and name H2' ) (residue 17 and name H6 ) 3.69 0.77 0.96 !
assign (residue 17 and name H2' ) (residue 18 and name H1' ) 4.70 0.99 1.22 !
assign (residue 17 and name H2' ) (residue 18 and name H8 ) 2.47 0.52 0.64 !
assign (residue 17 and name H3' ) (residue 17 and name H1' ) 3.69 0.78 0.96 !
assign (residue 17 and name H3' ) (residue 18 and name H8 ) 3.11 0.65 0.81 !
assign (residue 18 and name H1' ) (residue 18 and name H8 ) 4.27 0.90 1.11 !
assign (residue 18 and name H2' ) (residue 18 and name H8 ) 3.46 0.73 0.90 !
assign (residue 18 and name H3' ) (residue 18 and name H1' ) 4.46 0.94 1.16 !
assign (residue 18 and name H3' ) (residue 18 and name H8 ) 2.64 0.55 0.69 !
assign (residue 19 and name H1' ) (residue 18 and name H2 ) 5.03 1.06 1.31 !
assign (residue 19 and name H2' ) (residue 19 and name H1' ) 2.82 0.59 0.73 !
assign (residue 19 and name H3' ) (residue 19 and name H8 ) 2.72 0.57 0.71 !
assign (residue 19 and name H4' ) (residue 19 and name H1' ) 3.15 0.66 0.82 !
assign (residue 20 and name H1' ) (residue 20 and name H8 ) 3.85 0.81 1.00 !
assign (residue 20 and name H2' ) (residue 20 and name H8 ) 3.79 0.80 0.98 !
assign (residue 20 and name H2' ) (residue 21 and name H1' ) 3.45 0.72 0.90 !
assign (residue 20 and name H2' ) (residue 21 and name H8 ) 2.77 0.58 0.72 !
assign (residue 20 and name H3' ) (residue 20 and name H8 ) 3.28 0.69 0.85 !
assign (residue 20 and name H3' ) (residue 21 and name H8 ) 2.59 0.54 0.67 !
assign (residue 21 and name H1' ) (residue 20 and name H2 ) 3.25 0.68 0.85 !
assign (residue 21 and name H1' ) (residue 21 and name H8 ) 4.47 0.94 1.16 !
assign (residue 21 and name H2' ) (residue 22 and name H1' ) 5.01 1.05 1.30 !
assign (residue 21 and name H3' ) (residue 21 and name H8 ) 2.90 0.61 0.75 !
assign (residue 22 and name H1' ) (residue 21 and name H2 ) 4.02 0.84 1.05 !
assign (residue 22 and name H4' ) (residue 22 and name H1' ) 3.72 0.78 0.97 !
assign (residue 23 and name H2' ) (residue 23 and name H6 ) 3.60 0.76 0.94 !
assign (residue 25 and name H3' ) (residue 25 and name H8 ) 3.10 0.65 0.81 !
assign (residue 17 and name H3' ) (residue 17 and name H6 ) 2.60 0.55 0.68 !
assign (residue 18 and name H2' ) (residue 18 and name H1' ) 2.60 0.55 0.68 !
assign (residue 18 and name H2' ) (residue 19 and name H1' ) 3.69 0.78 0.96 !
assign (residue 18 and name H2' ) (residue 19 and name H8 ) 3.02 0.63 0.79 !
assign (residue 19 and name H2' ) (residue 21 and name H8 ) 3.90 0.82 1.01 !
assign (residue 19 and name H3' ) (residue 19 and name H1' ) 4.09 0.86 1.06 !
assign (residue 20 and name H4' ) (residue 20 and name H1' ) 3.47 0.73 0.90 !
assign (residue 21 and name H2' ) (residue 21 and name H1' ) 2.72 0.57 0.71 !
assign (residue 21 and name H3' ) (residue 21 and name H1' ) 3.66 0.77 0.95 !
assign (residue 21 and name H4' ) (residue 21 and name H1' ) 3.62 0.76 0.94 !
assign (residue 22 and name H2' ) (residue 22 and name H1' ) 2.87 0.60 0.75 !
assign (residue 22 and name H2' ) (residue 23 and name H6 ) 2.80 0.59 0.73 !
assign (residue 22 and name H3' ) (residue 23 and name H6 ) 2.63 0.55 0.68 !
assign (residue 23 and name H2' ) (residue 24 and name H1' ) 3.13 0.66 0.82 !
assign (residue 17 and name H41 ) (residue 24 and name H1 ) 2.33 0.93 0.93 !
assign (residue 18 and name H1' ) (residue 24 and name N2 ) 2.62 1.05 2.05 !
assign (residue 22 and name H8 ) (residue 19 and name H21 ) 2.88 1.15 1.15 !
assign (residue 23 and name N4 ) (residue 18 and name H2 ) 2.70 1.08 2.08 !
assign (residue 25 and name H1' ) (residue 24 and name N2 ) 2.77 1.11 2.11 !
assign (residue 8 and name H2' ) (residue 8 and name H1' ) 2.60 0.55 0.68 !
assign (residue 8 and name H3' ) (residue 8 and name H6 ) 2.42 0.51 0.63 !
assign (residue 8 and name H4' ) (residue 8 and name H1' ) 2.75 0.58 0.71 !
assign (residue 9 and name H2' ) (residue 9 and name H1' ) 2.62 0.55 0.68 !
assign (residue 9 and name H2' ) (residue 10 and name H8 ) 1.80 0.00 3.20 !
assign (residue 9 and name H3' ) (residue 9 and name H8 ) 3.05 0.64 0.79 !
```

## Distance restraints for AMBER modeling of 39-nt hairpin (continued)

```
assign (residue 9 and name H4' ) (residue 9 and name H1' ) 3.19 0.67 0.83 !
assign (residue 11 and name H2' ) (residue 11 and name H1' ) 2.90 0.61 0.75 !
assign (residue 11 and name H2' ) (residue 12 and name H6 ) 2.51 0.53 0.65 !
assign (residue 12 and name H2' ) (residue 12 and name H1' ) 2.71 0.57 0.71 !
assign (residue 12 and name H2' ) (residue 12 and name H6 ) 4.05 0.85 1.05 !
assign (residue 12 and name H2' ) (residue 13 and name H6 ) 2.32 0.49 0.60 !
assign (residue 12 and name H3' ) (residue 12 and name H6 ) 2.54 0.53 0.66 !
assign (residue 13 and name H3' ) (residue 13 and name H1' ) 3.11 0.65 0.81 !
assign (residue 13 and name H3' ) (residue 13 and name H6 ) 2.35 0.49 0.61 !
assign (residue 13 and name H4' ) (residue 13 and name H1' ) 3.05 0.64 0.79 !
assign (residue 28 and name H2' ) (residue 28 and name H8 ) 3.68 0.77 0.96 !
assign (residue 28 and name H2' ) (residue 29 and name H1' ) 4.33 0.91 1.13 !
assign (residue 28 and name H2' ) (residue 29 and name H8 ) 2.48 0.52 0.65 !
assign (residue 28 and name H3' ) (residue 28 and name H1' ) 3.21 0.67 0.84 !
assign (residue 28 and name H3' ) (residue 28 and name H8 ) 2.89 0.61 0.75 !
assign (residue 28 and name H3' ) (residue 29 and name H8 ) 3.28 0.69 0.85 !
assign (residue 28 and name H4' ) (residue 28 and name H1' ) 3.18 0.67 0.83 !
assign (residue 29 and name H2' ) (residue 29 and name H8 ) 4.42 0.93 1.15 !
assign (residue 29 and name H2' ) (residue 30 and name H1' ) 4.37 0.92 1.14 !
assign (residue 29 and name H2' ) (residue 30 and name H8 ) 2.48 0.52 0.64 !
assign (residue 29 and name H3' ) (residue 29 and name H8 ) 2.81 0.59 0.73 !
assign (residue 29 and name H3' ) (residue 30 and name H8 ) 3.38 0.71 0.88 !
assign (residue 30 and name H2' ) (residue 30 and name H1' ) 2.77 0.58 0.72 !
assign (residue 30 and name H2' ) (residue 31 and name H8 ) 2.49 0.52 0.65 !
assign (residue 30 and name H3' ) (residue 30 and name H1' ) 3.99 0.84 1.04 !
assign (residue 30 and name H3' ) (residue 30 and name H8 ) 2.88 0.61 0.75 !
assign (residue 30 and name H3' ) (residue 31 and name H8 ) 3.74 0.79 0.97 !
assign (residue 30 and name H4' ) (residue 30 and name H1' ) 3.47 0.73 0.90 !
assign (residue 31 and name H2' ) (residue 31 and name H1' ) 2.61 0.55 0.68 !
assign (residue 31 and name H3' ) (residue 31 and name H1' ) 3.82 0.80 0.99 !
assign (residue 31 and name H3' ) (residue 31 and name H8 ) 2.78 0.58 0.72 !
assign (residue 31 and name H4' ) (residue 31 and name H1' ) 3.34 0.70 0.87 !
assign (residue 32 and name H2' ) (residue 33 and name H6 ) 2.44 0.51 0.63 !
assign (residue 32 and name H3' ) (residue 33 and name H6 ) 3.21 0.67 0.83 !
assign (residue 33 and name H2' ) (residue 34 and name H1' ) 3.64 0.76 0.95 !
assign (residue 33 and name H2' ) (residue 34 and name H8 ) 2.34 0.49 0.61 !
assign (residue 33 and name H3' ) (residue 33 and name H1' ) 2.50 0.00 2.00 !
assign (residue 33 and name H3' ) (residue 33 and name H6 ) 2.43 0.51 0.63 !
assign (residue 34 and name H2' ) (residue 34 and name H8 ) 3.51 0.74 0.91 !
assign (residue 34 and name H2' ) (residue 35 and name H1' ) 3.71 0.78 0.96 !
assign (residue 34 and name H2' ) (residue 35 and name H6 ) 2.44 0.51 0.63 !
assign (residue 34 and name H3' ) (residue 34 and name H8 ) 2.53 0.53 0.66 !
assign (residue 35 and name H3' ) (residue 35 and name H6 ) 2.51 0.53 0.65 !
assign (residue 8 and name H1' ) (residue 8 and name H6 ) 3.83 0.80 0.99 !
assign (residue 8 and name H3' ) (residue 8 and name H1' ) 3.19 0.67 0.83 !
assign (residue 10 and name H1' ) (residue 10 and name H8 ) 3.02 0.63 0.78 !
assign (residue 11 and name H1' ) (residue 11 and name H8 ) 3.20 0.00 0.90 !
assign (residue 12 and name H1' ) (residue 12 and name H6 ) 3.20 0.00 0.90 !
assign (residue 13 and name H1' ) (residue 13 and name H6 ) 4.48 0.94 1.17 !
assign (residue 29 and name H2' ) (residue 29 and name H1' ) 2.45 0.51 0.64 !
assign (residue 29 and name H3' ) (residue 29 and name H1' ) 2.50 0.00 2.00 !
assign (residue 31 and name H2' ) (residue 32 and name H8 ) 3.17 0.67 0.82 !
assign (residue 32 and name H1' ) (residue 31 and name H2 ) 3.51 0.74 0.91 !
```

## Distance restraints for AMBER modeling of 39-nt hairpin (continued)

|                                                              |      |      |        |
|--------------------------------------------------------------|------|------|--------|
| assign (residue 34 and name H1' ) (residue 9 and name H2 )   | 4.10 | 0.86 | 1.07 ! |
| assign (residue 34 and name H2' ) (residue 34 and name H1' ) | 2.39 | 0.50 | 0.62 ! |
| assign (residue 34 and name H3' ) (residue 34 and name H1' ) | 3.10 | 0.65 | 0.81 ! |
| assign (residue 34 and name H3' ) (residue 35 and name H6 )  | 3.00 | 0.63 | 0.78 ! |
| assign (residue 35 and name H1' ) (residue 35 and name H6 )  | 3.84 | 0.81 | 1.00 ! |
| assign (residue 9 and name H2 ) (residue 33 and name H3 )    | 2.57 | 1.03 | 1.03 ! |
| assign (residue 9 and name H2 ) (residue 34 and name H1 )    | 4.19 | 1.68 | 1.68 ! |
| assign (residue 12 and name H1' ) (residue 11 and name H1 )  | 3.55 | 1.42 | 1.42 ! |
| assign (residue 12 and name H41 ) (residue 30 and name H1 )  | 2.15 | 0.86 | 0.86 ! |
| assign (residue 13 and name H1' ) (residue 30 and name H1 )  | 4.41 | 1.76 | 1.76 ! |
| assign (residue 30 and name H1' ) (residue 29 and name H1 )  | 3.42 | 1.37 | 1.37 ! |
| assign (residue 31 and name H2 ) (residue 11 and name H1 )   | 2.77 | 1.11 | 1.11 ! |
| assign (residue 11 and name H22 ) (residue 31 and name H2 )  | 1.80 | 0.00 | 1.50 ! |
| assign (residue 5 and name H1' ) (residue 4 and name H3 )    | 5.25 | 2.10 | 2.10 ! |
| assign (residue 6 and name H5 ) (residue 5 and name H3 )     | 5.66 | 2.27 | 2.27 ! |
| assign (residue 28 and name H1 ) (residue 14 and name H3 )   | 2.29 | 0.92 | 0.92 ! |
| assign (residue 37 and name H1 ) (residue 5 and name H3 )    | 3.10 | 1.24 | 1.24 ! |
| assign (residue 37 and name N2 ) (residue 5 and name H3 )    | 3.00 | 0.00 | 3.00 ! |
| assign (residue 3 and name H2 ) (residue 39 and name H3 )    | 4.01 | 1.60 | 1.60 ! |
| assign (residue 5 and name H3 ) (residue 4 and name H3 )     | 4.07 | 1.63 | 1.63 ! |
| assign (residue 5 and name H3 ) (residue 6 and name H3 )     | 4.54 | 1.81 | 1.81 ! |
| assign (residue 6 and name H1' ) (residue 37 and name H1 )   | 3.81 | 1.52 | 1.52 ! |
| assign (residue 7 and name H1 ) (residue 6 and name H3 )     | 5.07 | 2.03 | 2.03 ! |
| assign (residue 7 and name H1' ) (residue 6 and name H3 )    | 3.00 | 0.00 | 5.00 ! |
| assign (residue 7 and name N2 ) (residue 6 and name H3 )     | 3.00 | 0.00 | 4.00 ! |
| assign (residue 14 and name H1' ) (residue 14 and name H3 )  | 4.84 | 1.94 | 1.94 ! |
| assign (residue 14 and name H1' ) (residue 28 and name H1 )  | 4.86 | 1.94 | 1.94 ! |
| assign (residue 14 and name H1' ) (residue 29 and name H1 )  | 3.49 | 1.40 | 1.40 ! |
| assign (residue 14 and name H3 ) (residue 29 and name H1 )   | 4.08 | 1.63 | 1.63 ! |
| assign (residue 15 and name H1' ) (residue 14 and name H3 )  | 4.73 | 1.89 | 1.89 ! |
| assign (residue 15 and name H1' ) (residue 28 and name H1 )  | 3.59 | 1.44 | 1.44 ! |
| assign (residue 15 and name H2 ) (residue 14 and name H3 )   | 5.65 | 2.26 | 2.26 ! |
| assign (residue 15 and name H2 ) (residue 28 and name H1 )   | 5.16 | 2.06 | 2.06 ! |
| assign (residue 28 and name H1 ) (residue 14 and name H3 )   | 2.76 | 1.10 | 1.10 ! |
| assign (residue 28 and name H1 ) (residue 29 and name H1 )   | 4.58 | 1.83 | 1.83 ! |
| assign (residue 28 and name N2 ) (residue 14 and name H3 )   | 3.00 | 0.00 | 3.00 ! |
| assign (residue 28 and name N2 ) (residue 29 and name H1 )   | 3.00 | 0.00 | 4.00 ! |
| assign (residue 29 and name H1' ) (residue 14 and name H3 )  | 3.00 | 0.00 | 5.00 ! |
| assign (residue 35 and name N4 ) (residue 6 and name H3 )    | 4.31 | 1.72 | 2.72 ! |
| assign (residue 36 and name H1' ) (residue 6 and name H3 )   | 3.00 | 0.00 | 5.00 ! |
| assign (residue 37 and name H1 ) (residue 4 and name H3 )    | 5.52 | 2.21 | 2.21 ! |
| assign (residue 37 and name H1 ) (residue 6 and name H3 )    | 4.37 | 1.75 | 1.75 ! |
| assign (residue 37 and name H1' ) (residue 6 and name H3 )   | 4.51 | 1.80 | 1.80 ! |
| assign (residue 39 and name H1' ) (residue 4 and name H3 )   | 5.08 | 2.03 | 2.03 ! |
| assign (residue 3 and name H1' ) (residue 3 and name H8 )    | 5.00 | 2.00 | 2.00 ! |
| assign (residue 3 and name H2' ) (residue 3 and name H1' )   | 3.26 | 1.31 | 1.31 ! |
| assign (residue 3 and name H2' ) (residue 3 and name H8 )    | 2.00 | 0.00 | 2.50 ! |
| assign (residue 4 and name H1' ) (residue 3 and name H2 )    | 2.00 | 0.00 | 3.00 ! |
| assign (residue 4 and name H1' ) (residue 4 and name H6 )    | 2.00 | 0.00 | 3.00 ! |
| assign (residue 4 and name H2' ) (residue 4 and name H1' )   | 3.23 | 1.29 | 1.29 ! |
| assign (residue 5 and name H1' ) (residue 38 and name H2 )   | 3.43 | 1.37 | 1.37 ! |
| assign (residue 7 and name H1' ) (residue 36 and name H2 )   | 3.58 | 1.43 | 1.43 ! |
| assign (residue 7 and name H2' ) (residue 8 and name H6 )    | 1.80 | 0.00 | 2.70 ! |

## Distance restraints for AMBER modeling of 39-nt hairpin (continued)

```
assign (residue 13 and name H2' ) (residue 14 and name H6 ) 2.29 0.92 0.92 !
assign (residue 14 and name H1' ) (residue 14 and name H6 ) 3.33 1.33 1.33 !
assign (residue 14 and name H2' ) (residue 14 and name H6 ) 3.05 1.22 1.22 !
assign (residue 14 and name H2' ) (residue 15 and name H8 ) 2.18 0.87 0.87 !
assign (residue 14 and name H5 ) (residue 13 and name H6 ) 3.74 1.50 1.50 !
assign (residue 15 and name H8 ) (residue 14 and name H6 ) 4.52 1.81 1.81 !
assign (residue 15 and name H1' ) (residue 15 and name H8 ) 3.87 1.55 1.55 !
assign (residue 15 and name H1' ) (residue 28 and name N2 ) 2.00 0.00 2.00 !
assign (residue 15 and name H2' ) (residue 15 and name H1' ) 2.00 0.00 1.50 !
assign (residue 15 and name H2' ) (residue 15 and name H8 ) 2.00 0.00 2.50 !
assign (residue 15 and name H2' ) (residue 16 and name H6 ) 2.00 0.00 2.00 !
assign (residue 16 and name H1' ) (residue 15 and name H2 ) 3.01 1.20 1.20 !
assign (residue 17 and name H1' ) (residue 26 and name H2 ) 3.00 0.00 2.50 !
assign (residue 23 and name H5 ) (residue 18 and name H2 ) 3.66 1.46 2.46 !
assign (residue 25 and name H2' ) (residue 27 and name H6 ) 4.00 0.00 99.00 !
assign (residue 26 and name H1' ) (residue 26 and name H8 ) 4.38 1.75 1.75 !
assign (residue 26 and name H2' ) (residue 26 and name H1' ) 2.71 1.08 1.08 !
assign (residue 27 and name H1' ) (residue 27 and name H6 ) 3.37 1.35 1.35 !
assign (residue 27 and name H2' ) (residue 27 and name H1' ) 2.00 0.00 1.50 !
assign (residue 27 and name H5 ) (residue 26 and name H8 ) 4.07 1.63 1.63 !
assign (residue 26 and name H8 ) (residue 27 and name H6 ) 4.07 1.63 1.63 !
assign (residue 28 and name H1' ) (residue 15 and name H2 ) 3.19 1.28 1.28 !
assign (residue 29 and name H1' ) (residue 28 and name N2 ) 2.00 0.00 2.00 !
assign (residue 35 and name H2' ) (residue 36 and name H8 ) 1.80 0.00 2.70 !
assign (residue 36 and name H1' ) (residue 36 and name H8 ) 4.24 1.70 1.70 !
assign (residue 36 and name H2' ) (residue 36 and name H1' ) 2.45 0.98 0.98 !
assign (residue 36 and name H2' ) (residue 37 and name H8 ) 2.53 1.01 1.01 !
assign (residue 37 and name H1' ) (residue 36 and name H2 ) 4.62 1.85 1.85 !
assign (residue 38 and name H1' ) (residue 37 and name N2 ) 2.00 0.00 2.00 !
assign (residue 38 and name H2' ) (residue 39 and name H6 ) 2.00 0.00 2.50 !
assign (residue 39 and name H1' ) (residue 39 and name H6 ) 4.02 1.61 1.61 !
assign (residue 39 and name H2' ) (residue 39 and name H1' ) 3.26 1.30 1.30 !
assign (residue 39 and name H2' ) (residue 39 and name H6 ) 2.00 0.00 2.50 !

assign (resid 3 and name N1 ) (resid 39 and name H3 ) 2.1 0.3 0.3
assign (resid 3 and name H61 ) (resid 39 and name O4 ) 2.1 0.3 0.3
assign (resid 4 and name H3 ) (resid 38 and name N1 ) 2.1 0.3 0.3
assign (resid 4 and name O4 ) (resid 38 and name H61 ) 2.1 0.3 0.3
assign (resid 5 and name H3 ) (resid 37 and name O6 ) 2.1 0.3 0.3
assign (resid 5 and name O2 ) (resid 37 and name H1 ) 2.1 0.3 0.3
assign (resid 6 and name H3 ) (resid 36 and name N1 ) 2.1 0.3 0.3
assign (resid 6 and name O4 ) (resid 36 and name H61 ) 2.1 0.3 0.3
assign (resid 7 and name H1 ) (resid 35 and name N3 ) 2.1 0.3 0.3
assign (resid 7 and name O6 ) (resid 35 and name H41 ) 2.1 0.3 0.3
assign (resid 7 and name H22 ) (resid 35 and name O2 ) 2.1 0.3 0.3
assign (resid 8 and name N3 ) (resid 34 and name H1 ) 2.1 0.3 0.3
assign (resid 8 and name H41 ) (resid 34 and name O6 ) 2.1 0.3 0.3
assign (resid 8 and name O2 ) (resid 34 and name H22 ) 2.1 0.3 0.3
assign (resid 9 and name N1 ) (resid 33 and name H3 ) 2.1 0.3 0.3
assign (resid 9 and name H61 ) (resid 33 and name O4 ) 2.1 0.3 0.3
assign (resid 12 and name N3 ) (resid 30 and name H1 ) 2.1 0.3 0.3
assign (resid 12 and name H41 ) (resid 30 and name O6 ) 2.1 0.3 0.3
assign (resid 12 and name O2 ) (resid 30 and name H22 ) 2.1 0.3 0.3
```



### Distance restraints for AMBER modeling of 39-nt hairpin (continued)

```
assign (resid 13 and name N3 ) (resid 29 and name H1 ) 2.1 0.3 0.3
assign (resid 13 and name H41 ) (resid 29 and name O6 ) 2.1 0.3 0.3
assign (resid 13 and name O2 ) (resid 29 and name H22 ) 2.1 0.3 0.3
assign (resid 14 and name H3 ) (resid 28 and name O6 ) 2.1 0.3 0.3
assign (resid 14 and name O2 ) (resid 28 and name H1 ) 2.1 0.3 0.3
assign (resid 15 and name N1 ) (resid 27 and name H3 ) 2.1 0.3 0.3
assign (resid 15 and name H61 ) (resid 27 and name O4 ) 2.1 0.3 0.3
assign (resid 16 and name N3 ) (resid 25 and name H1 ) 2.1 0.3 0.3
assign (resid 16 and name H41 ) (resid 25 and name O6 ) 2.1 0.3 0.3
assign (resid 16 and name O2 ) (resid 25 and name H22 ) 2.1 0.3 0.3
assign (resid 17 and name N3 ) (resid 24 and name H1 ) 2.1 0.3 0.3
assign (resid 17 and name H41 ) (resid 24 and name O6 ) 2.1 0.3 0.3
assign (resid 17 and name O2 ) (resid 24 and name H22 ) 2.1 0.3 0.3
```

## Dihedral restraints for AMBER modeling of 39-nt hairpin

|    |     |       |        |       |    |     |        |        |       |
|----|-----|-------|--------|-------|----|-----|--------|--------|-------|
| 2  | GUA | ALPHA | -155.0 | 25.0  | 18 | ADE | GAMMA  | 0.0    | 120.0 |
| 3  | ADE | ALPHA | -155.0 | 25.0  | 28 | GUA | GAMMA  | 0.0    | 120.0 |
| 4  | URA | ALPHA | -155.0 | 25.0  | 29 | GUA | GAMMA  | 0.0    | 120.0 |
| 5  | URA | ALPHA | -155.0 | 25.0  | 30 | GUA | GAMMA  | 0.0    | 120.0 |
| 6  | URA | ALPHA | -155.0 | 25.0  | 34 | GUA | GAMMA  | 0.0    | 120.0 |
| 7  | GUA | ALPHA | -155.0 | 25.0  | 35 | CYT | GAMMA  | 0.0    | 120.0 |
| 8  | CYT | ALPHA | -155.0 | 25.0  | 36 | ADE | GAMMA  | 0.0    | 120.0 |
| 9  | ADE | ALPHA | -155.0 | 25.0  | 37 | GUA | GAMMA  | 0.0    | 120.0 |
| 13 | CYT | ALPHA | -155.0 | 25.0  | 38 | ADE | GAMMA  | 0.0    | 120.0 |
| 14 | URA | ALPHA | -155.0 | 25.0  | 39 | URA | GAMMA  | 0.0    | 120.0 |
| 17 | CYT | ALPHA | -155.0 | 25.0  | 1  | GUA | DELTA  | 45.0   | 115.0 |
| 18 | ADE | ALPHA | -155.0 | 25.0  | 2  | GUA | DELTA  | 45.0   | 115.0 |
| 28 | GUA | ALPHA | -155.0 | 25.0  | 3  | ADE | DELTA  | 45.0   | 115.0 |
| 29 | GUA | ALPHA | -155.0 | 25.0  | 4  | URA | DELTA  | 45.0   | 115.0 |
| 30 | GUA | ALPHA | -155.0 | 25.0  | 5  | URA | DELTA  | 45.0   | 115.0 |
| 34 | GUA | ALPHA | -155.0 | 25.0  | 6  | URA | DELTA  | 45.0   | 115.0 |
| 35 | CYT | ALPHA | -155.0 | 25.0  | 7  | GUA | DELTA  | 45.0   | 115.0 |
| 36 | ADE | ALPHA | -155.0 | 25.0  | 8  | CYT | DELTA  | 45.0   | 115.0 |
| 37 | GUA | ALPHA | -155.0 | 25.0  | 9  | ADE | DELTA  | 45.0   | 115.0 |
| 38 | ADE | ALPHA | -155.0 | 25.0  | 12 | CYT | DELTA  | 45.0   | 115.0 |
| 39 | URA | ALPHA | -155.0 | 25.0  | 13 | CYT | DELTA  | 45.0   | 115.0 |
| 2  | GUA | BETA  | 90.0   | 240.0 | 14 | URA | DELTA  | 45.0   | 115.0 |
| 3  | ADE | BETA  | 90.0   | 240.0 | 15 | ADE | DELTA  | 45.0   | 115.0 |
| 4  | URA | BETA  | 90.0   | 240.0 | 16 | CYT | DELTA  | 45.0   | 115.0 |
| 5  | URA | BETA  | 90.0   | 240.0 | 17 | CYT | DELTA  | 45.0   | 115.0 |
| 6  | URA | BETA  | 90.0   | 240.0 | 18 | ADE | DELTA  | 45.0   | 115.0 |
| 7  | GUA | BETA  | 90.0   | 240.0 | 23 | CYT | DELTA  | 45.0   | 115.0 |
| 8  | CYT | BETA  | 90.0   | 240.0 | 26 | ADE | DELTA  | 45.0   | 115.0 |
| 9  | ADE | BETA  | 90.0   | 240.0 | 27 | URA | DELTA  | 45.0   | 115.0 |
| 13 | CYT | BETA  | 90.0   | 240.0 | 28 | GUA | DELTA  | 45.0   | 115.0 |
| 14 | URA | BETA  | 90.0   | 240.0 | 29 | GUA | DELTA  | 45.0   | 115.0 |
| 17 | CYT | BETA  | 90.0   | 240.0 | 30 | GUA | DELTA  | 45.0   | 115.0 |
| 18 | ADE | BETA  | 90.0   | 240.0 | 31 | ADE | DELTA  | 45.0   | 115.0 |
| 28 | GUA | BETA  | 90.0   | 240.0 | 33 | URA | DELTA  | 45.0   | 115.0 |
| 29 | GUA | BETA  | 90.0   | 240.0 | 34 | GUA | DELTA  | 45.0   | 115.0 |
| 30 | GUA | BETA  | 90.0   | 240.0 | 35 | CYT | DELTA  | 45.0   | 115.0 |
| 34 | GUA | BETA  | 90.0   | 240.0 | 36 | ADE | DELTA  | 45.0   | 115.0 |
| 35 | CYT | BETA  | 90.0   | 240.0 | 37 | GUA | DELTA  | 45.0   | 115.0 |
| 36 | ADE | BETA  | 90.0   | 240.0 | 38 | ADE | DELTA  | 45.0   | 115.0 |
| 37 | GUA | BETA  | 90.0   | 240.0 | 39 | URA | DELTA  | 45.0   | 115.0 |
| 38 | ADE | BETA  | 90.0   | 240.0 | 1  | GUA | EPSILN | -240.0 | 10.0  |
| 39 | URA | BETA  | 90.0   | 240.0 | 2  | GUA | EPSILN | -240.0 | 10.0  |
| 1  | GUA | GAMMA | 0.0    | 120.0 | 3  | ADE | EPSILN | -240.0 | 10.0  |
| 2  | GUA | GAMMA | 0.0    | 120.0 | 4  | URA | EPSILN | -240.0 | 10.0  |
| 3  | ADE | GAMMA | 0.0    | 120.0 | 5  | URA | EPSILN | -240.0 | 10.0  |
| 4  | URA | GAMMA | 0.0    | 120.0 | 6  | URA | EPSILN | -240.0 | 10.0  |
| 5  | URA | GAMMA | 0.0    | 120.0 | 7  | GUA | EPSILN | -240.0 | 10.0  |
| 6  | URA | GAMMA | 0.0    | 120.0 | 8  | CYT | EPSILN | -240.0 | 10.0  |
| 7  | GUA | GAMMA | 0.0    | 120.0 | 12 | CYT | EPSILN | -240.0 | 10.0  |
| 8  | CYT | GAMMA | 0.0    | 120.0 | 13 | CYT | EPSILN | -240.0 | 10.0  |
| 9  | ADE | GAMMA | 0.0    | 120.0 | 14 | URA | EPSILN | -240.0 | 10.0  |
| 13 | CYT | GAMMA | 0.0    | 120.0 | 16 | CYT | EPSILN | -240.0 | 10.0  |
| 14 | URA | GAMMA | 0.0    | 120.0 | 17 | CYT | EPSILN | -240.0 | 10.0  |
| 17 | CYT | GAMMA | 0.0    | 120.0 | 27 | URA | EPSILN | -240.0 | 10.0  |

### Dihedral restraints for AMBER modeling of 39-nt hairpin (continued)

|    |     |        |        |       |    |     |     |       |       |
|----|-----|--------|--------|-------|----|-----|-----|-------|-------|
| 28 | GUA | EPSILN | -240.0 | 10.0  | 26 | ADE | CHI | 170.0 | 340.0 |
| 29 | GUA | EPSILN | -240.0 | 10.0  | 27 | URA | CHI | 170.0 | 340.0 |
| 33 | URA | EPSILN | -240.0 | 10.0  | 28 | GUA | CHI | 170.0 | 340.0 |
| 34 | GUA | EPSILN | -240.0 | 10.0  | 29 | GUA | CHI | 170.0 | 340.0 |
| 35 | CYT | EPSILN | -240.0 | 10.0  | 30 | GUA | CHI | 170.0 | 340.0 |
| 36 | ADE | EPSILN | -240.0 | 10.0  | 31 | ADE | CHI | 170.0 | 340.0 |
| 37 | GUA | EPSILN | -240.0 | 10.0  | 32 | GUA | CHI | 170.0 | 340.0 |
| 38 | ADE | EPSILN | -240.0 | 10.0  | 33 | URA | CHI | 170.0 | 340.0 |
| 1  | GUA | ZETA   | -160.0 | 20.0  | 34 | GUA | CHI | 170.0 | 340.0 |
| 2  | GUA | ZETA   | -160.0 | 20.0  | 35 | CYT | CHI | 170.0 | 340.0 |
| 3  | ADE | ZETA   | -160.0 | 20.0  | 36 | ADE | CHI | 170.0 | 340.0 |
| 4  | URA | ZETA   | -160.0 | 20.0  | 37 | GUA | CHI | 170.0 | 340.0 |
| 5  | URA | ZETA   | -160.0 | 20.0  | 38 | ADE | CHI | 170.0 | 340.0 |
| 6  | URA | ZETA   | -160.0 | 20.0  | 39 | URA | CHI | 170.0 | 340.0 |
| 7  | GUA | ZETA   | -160.0 | 20.0  |    |     |     |       |       |
| 8  | CYT | ZETA   | -160.0 | 20.0  |    |     |     |       |       |
| 12 | CYT | ZETA   | -160.0 | 20.0  |    |     |     |       |       |
| 13 | CYT | ZETA   | -160.0 | 20.0  |    |     |     |       |       |
| 14 | URA | ZETA   | -160.0 | 20.0  |    |     |     |       |       |
| 16 | CYT | ZETA   | -160.0 | 20.0  |    |     |     |       |       |
| 17 | CYT | ZETA   | -160.0 | 20.0  |    |     |     |       |       |
| 27 | URA | ZETA   | -160.0 | 20.0  |    |     |     |       |       |
| 28 | GUA | ZETA   | -160.0 | 20.0  |    |     |     |       |       |
| 29 | GUA | ZETA   | -160.0 | 20.0  |    |     |     |       |       |
| 33 | URA | ZETA   | -160.0 | 20.0  |    |     |     |       |       |
| 34 | GUA | ZETA   | -160.0 | 20.0  |    |     |     |       |       |
| 35 | CYT | ZETA   | -160.0 | 20.0  |    |     |     |       |       |
| 36 | ADE | ZETA   | -160.0 | 20.0  |    |     |     |       |       |
| 37 | GUA | ZETA   | -160.0 | 20.0  |    |     |     |       |       |
| 38 | ADE | ZETA   | -160.0 | 20.0  |    |     |     |       |       |
| 1  | GUA | CHI    | 170.0  | 340.0 |    |     |     |       |       |
| 2  | GUA | CHI    | 170.0  | 340.0 |    |     |     |       |       |
| 3  | ADE | CHI    | 170.0  | 340.0 |    |     |     |       |       |
| 4  | URA | CHI    | 170.0  | 340.0 |    |     |     |       |       |
| 5  | URA | CHI    | 170.0  | 340.0 |    |     |     |       |       |
| 6  | URA | CHI    | 170.0  | 340.0 |    |     |     |       |       |
| 7  | GUA | CHI    | 170.0  | 340.0 |    |     |     |       |       |
| 8  | CYT | CHI    | 170.0  | 340.0 |    |     |     |       |       |
| 9  | ADE | CHI    | 170.0  | 340.0 |    |     |     |       |       |
| 11 | GUA | CHI    | 170.0  | 340.0 |    |     |     |       |       |
| 12 | CYT | CHI    | 170.0  | 340.0 |    |     |     |       |       |
| 13 | CYT | CHI    | 170.0  | 340.0 |    |     |     |       |       |
| 14 | URA | CHI    | 170.0  | 340.0 |    |     |     |       |       |
| 15 | ADE | CHI    | 170.0  | 340.0 |    |     |     |       |       |
| 16 | CYT | CHI    | 170.0  | 340.0 |    |     |     |       |       |
| 17 | CYT | CHI    | 170.0  | 340.0 |    |     |     |       |       |
| 18 | ADE | CHI    | 170.0  | 340.0 |    |     |     |       |       |
| 19 | GUA | CHI    | 170.0  | 340.0 |    |     |     |       |       |
| 20 | ADE | CHI    | 170.0  | 340.0 |    |     |     |       |       |
| 21 | ADE | CHI    | 170.0  | 340.0 |    |     |     |       |       |
| 22 | ADE | CHI    | 170.0  | 340.0 |    |     |     |       |       |
| 23 | CYT | CHI    | 170.0  | 340.0 |    |     |     |       |       |
| 24 | GUA | CHI    | 170.0  | 340.0 |    |     |     |       |       |
| 25 | GUA | CHI    | 170.0  | 340.0 |    |     |     |       |       |

## Distance restraints for AMBER modeling of 11-nt hairpin

```
assign (residue 16 and name H1' ) (residue 16 and name H6 ) 3.68 0.77 0.96
assign (residue 16 and name H1' ) (residue 26 and name H2 ) 3.86 0.81 1.00
assign (residue 17 and name H1' ) (residue 17 and name H6 ) 4.00 0.84 1.04
assign (residue 17 and name H2' ) (residue 17 and name H6 ) 3.69 0.77 0.96
assign (residue 17 and name H2' ) (residue 18 and name H1' ) 4.70 0.99 1.22
assign (residue 17 and name H2' ) (residue 18 and name H8 ) 2.47 0.52 0.64
assign (residue 17 and name H3' ) (residue 17 and name H1' ) 3.69 0.78 0.96
assign (residue 17 and name H3' ) (residue 18 and name H8 ) 3.11 0.65 0.81
assign (residue 18 and name H1' ) (residue 18 and name H8 ) 4.27 0.90 1.11
assign (residue 18 and name H2' ) (residue 18 and name H8 ) 3.46 0.73 0.90
assign (residue 18 and name H3' ) (residue 18 and name H1' ) 4.46 0.94 1.16
assign (residue 18 and name H3' ) (residue 18 and name H8 ) 2.64 0.55 0.69
assign (residue 19 and name H1' ) (residue 18 and name H2 ) 5.03 1.06 1.31
assign (residue 19 and name H2' ) (residue 19 and name H1' ) 2.82 0.59 0.73
assign (residue 19 and name H3' ) (residue 19 and name H8 ) 2.72 0.57 0.71
assign (residue 19 and name H4' ) (residue 19 and name H1' ) 3.15 0.66 0.82
assign (residue 20 and name H1' ) (residue 20 and name H8 ) 3.85 0.81 1.00
assign (residue 20 and name H2' ) (residue 20 and name H8 ) 3.79 0.80 0.98
assign (residue 20 and name H2' ) (residue 21 and name H1' ) 3.45 0.72 0.90
assign (residue 20 and name H2' ) (residue 21 and name H8 ) 2.77 0.58 0.72
assign (residue 20 and name H3' ) (residue 20 and name H8 ) 3.28 0.69 0.85
assign (residue 20 and name H3' ) (residue 21 and name H8 ) 2.59 0.54 0.67
assign (residue 21 and name H1' ) (residue 20 and name H2 ) 3.25 0.68 0.85
assign (residue 21 and name H1' ) (residue 21 and name H8 ) 4.47 0.94 1.16
assign (residue 21 and name H2' ) (residue 22 and name H1' ) 5.01 1.05 1.30
assign (residue 21 and name H3' ) (residue 21 and name H8 ) 2.90 0.61 0.75
assign (residue 22 and name H1' ) (residue 21 and name H2 ) 4.02 0.84 1.05
assign (residue 22 and name H4' ) (residue 22 and name H1' ) 3.72 0.78 0.97
assign (residue 23 and name H2' ) (residue 23 and name H6 ) 3.60 0.76 0.94
assign (residue 23 and name H2' ) (residue 24 and name H8 ) 3.17 0.67 0.83
assign (residue 24 and name H2' ) (residue 25 and name H8 ) 2.52 0.53 0.65
assign (residue 24 and name H3' ) (residue 24 and name H1' ) 3.09 0.65 0.80
assign (residue 24 and name H3' ) (residue 24 and name H8 ) 2.90 0.61 0.75
assign (residue 24 and name H3' ) (residue 25 and name H8 ) 3.03 0.64 0.79
assign (residue 25 and name H1' ) (residue 25 and name H8 ) 4.47 0.94 1.16
assign (residue 25 and name H2' ) (residue 25 and name H1' ) 2.66 0.56 0.69
assign (residue 25 and name H2' ) (residue 26 and name H1' ) 4.54 0.95 1.18
assign (residue 25 and name H3' ) (residue 25 and name H8 ) 3.10 0.65 0.81
assign (residue 26 and name H1' ) (residue 26 and name H2 ) 5.58 1.17 1.45
assign (residue 26 and name H1' ) (residue 26 and name H8 ) 4.29 0.90 1.12
assign (residue 17 and name H3' ) (residue 17 and name H6 ) 2.60 0.55 0.68
assign (residue 18 and name H2' ) (residue 18 and name H1' ) 2.60 0.55 0.68
assign (residue 18 and name H2' ) (residue 19 and name H1' ) 3.69 0.78 0.96
assign (residue 18 and name H2' ) (residue 19 and name H8 ) 3.02 0.63 0.79
assign (residue 19 and name H2' ) (residue 21 and name H8 ) 3.90 0.82 1.01
assign (residue 19 and name H3' ) (residue 19 and name H1' ) 4.09 0.86 1.06
assign (residue 20 and name H4' ) (residue 20 and name H1' ) 3.47 0.73 0.90
assign (residue 21 and name H2' ) (residue 21 and name H1' ) 2.72 0.57 0.71
assign (residue 21 and name H3' ) (residue 21 and name H1' ) 3.66 0.77 0.95
assign (residue 21 and name H4' ) (residue 21 and name H1' ) 3.62 0.76 0.94
assign (residue 22 and name H2' ) (residue 22 and name H1' ) 2.87 0.60 0.75
assign (residue 22 and name H2' ) (residue 23 and name H6 ) 2.80 0.59 0.73
assign (residue 22 and name H3' ) (residue 23 and name H6 ) 2.63 0.55 0.68
```

### Distance restraints for AMBER modeling of 11-nt hairpin (continued)

```
assign (residue 23 and name H2' ) (residue 24 and name H1' ) 3.13 0.66 0.82
assign (residue 17 and name H41 ) (residue 24 and name H1 ) 2.33 0.93 0.93
assign (residue 18 and name H1' ) (residue 24 and name N2 ) 2.62 1.05 2.05
assign (residue 22 and name H8 ) (residue 19 and name H21 ) 2.88 1.15 1.15
assign (residue 23 and name N4 ) (residue 18 and name H2 ) 2.70 1.08 2.08
assign (residue 25 and name H1' ) (residue 24 and name N2 ) 2.77 1.11 2.11

assign (resid 16 and name N3 ) (resid 25 and name H1 ) 2.1 0.3 0.3
assign (resid 16 and name H41 ) (resid 25 and name O6 ) 2.1 0.3 0.3
assign (resid 16 and name O2 ) (resid 25 and name H22 ) 2.1 0.3 0.3
assign (resid 17 and name N3 ) (resid 24 and name H1 ) 2.1 0.3 0.3
assign (resid 17 and name H41 ) (resid 24 and name O6 ) 2.1 0.3 0.3
assign (resid 17 and name O2 ) (resid 24 and name H22 ) 2.1 0.3 0.3
assign (resid 19 and name H1 ) (resid 19 and name H22 ) 1.8 0 0.7
assign (resid 24 and name H1 ) (resid 24 and name H22 ) 1.8 0 0.7
assign (resid 25 and name H1 ) (resid 25 and name H22 ) 1.8 0 0.7
```

## Dihedral restraints for AMBER modeling of 11-nt hairpin

|    |     |        |        |       |
|----|-----|--------|--------|-------|
| 17 | CYT | ALPHA  | -155.0 | 25.0  |
| 18 | ADE | ALPHA  | -155.0 | 25.0  |
| 17 | CYT | BETA   | 90.0   | 240.0 |
| 18 | ADE | BETA   | 90.0   | 240.0 |
| 17 | CYT | GAMMA  | 0.0    | 120.0 |
| 18 | ADE | GAMMA  | 0.0    | 120.0 |
| 16 | CYT | DELTA  | 45.0   | 115.0 |
| 17 | CYT | DELTA  | 45.0   | 115.0 |
| 18 | ADE | DELTA  | 45.0   | 115.0 |
| 23 | CYT | DELTA  | 45.0   | 115.0 |
| 26 | ADE | DELTA  | 45.0   | 115.0 |
| 16 | CYT | EPSILN | -240.0 | 10.0  |
| 17 | CYT | EPSILN | -240.0 | 10.0  |
| 16 | CYT | CHI    | 170.0  | 340.0 |
| 17 | CYT | CHI    | 170.0  | 340.0 |
| 18 | ADE | CHI    | 170.0  | 340.0 |
| 19 | GUA | CHI    | 170.0  | 340.0 |
| 20 | ADE | CHI    | 170.0  | 340.0 |
| 21 | ADE | CHI    | 170.0  | 340.0 |
| 22 | ADE | CHI    | 170.0  | 340.0 |
| 23 | CYT | CHI    | 170.0  | 340.0 |
| 24 | GUA | CHI    | 170.0  | 340.0 |
| 25 | GUA | CHI    | 170.0  | 340.0 |
| 26 | ADE | CHI    | 170.0  | 340.0 |

## Distance restraints for AMBER modeling of 19-nt duplex

|                                                              |      |      |      |
|--------------------------------------------------------------|------|------|------|
| assign (residue 8 and name H1' ) (residue 7 and name H1 )    | 3.93 | 1.57 | 1.57 |
| assign (residue 9 and name H2 ) (residue 33 and name H3 )    | 2.57 | 1.03 | 1.03 |
| assign (residue 9 and name H2 ) (residue 34 and name H1 )    | 4.19 | 1.68 | 1.68 |
| assign (residue 12 and name H1' ) (residue 11 and name H1 )  | 3.55 | 1.42 | 1.42 |
| assign (residue 12 and name H41 ) (residue 30 and name H1 )  | 2.15 | 0.86 | 0.86 |
| assign (residue 13 and name H1' ) (residue 30 and name H1 )  | 4.41 | 1.76 | 1.76 |
| assign (residue 14 and name H1' ) (residue 29 and name H1 )  | 3.93 | 1.57 | 1.57 |
| assign (residue 14 and name H41 ) (residue 28 and name H1 )  | 2.28 | 0.91 | 0.91 |
| assign (residue 30 and name H1' ) (residue 29 and name H1 )  | 3.42 | 1.37 | 1.37 |
| assign (residue 31 and name H2 ) (residue 11 and name H1 )   | 2.77 | 1.11 | 1.11 |
| assign (residue 35 and name H41 ) (residue 7 and name H1 )   | 2.10 | 0.84 | 0.84 |
| assign (residue 36 and name H1' ) (residue 7 and name H1 )   | 3.57 | 1.43 | 1.43 |
| assign (residue 11 and name H22 ) (residue 31 and name H2 )  | 1.80 | 0.00 | 1.50 |
| assign (residue 7 and name H2' ) (residue 8 and name H6 )    | 2.44 | 0.51 | 0.64 |
| assign (residue 7 and name H3' ) (residue 7 and name H8 )    | 3.45 | 0.72 | 0.90 |
| assign (residue 7 and name H4' ) (residue 7 and name H1' )   | 3.18 | 0.67 | 0.83 |
| assign (residue 8 and name H2' ) (residue 8 and name H1' )   | 2.60 | 0.55 | 0.68 |
| assign (residue 8 and name H3' ) (residue 8 and name H6 )    | 2.42 | 0.51 | 0.63 |
| assign (residue 8 and name H4' ) (residue 8 and name H1' )   | 2.75 | 0.58 | 0.71 |
| assign (residue 9 and name H2' ) (residue 9 and name H1' )   | 2.62 | 0.55 | 0.68 |
| assign (residue 9 and name H2' ) (residue 10 and name H8 )   | 1.80 | 0.00 | 3.20 |
| assign (residue 9 and name H3' ) (residue 9 and name H8 )    | 3.05 | 0.64 | 0.79 |
| assign (residue 9 and name H4' ) (residue 9 and name H1' )   | 3.19 | 0.67 | 0.83 |
| assign (residue 11 and name H2' ) (residue 11 and name H1' ) | 2.90 | 0.61 | 0.75 |
| assign (residue 11 and name H2' ) (residue 12 and name H6 )  | 2.51 | 0.53 | 0.65 |
| assign (residue 12 and name H2' ) (residue 12 and name H1' ) | 2.71 | 0.57 | 0.71 |
| assign (residue 12 and name H2' ) (residue 12 and name H6 )  | 4.05 | 0.85 | 1.05 |
| assign (residue 12 and name H2' ) (residue 13 and name H6 )  | 2.32 | 0.49 | 0.60 |
| assign (residue 12 and name H3' ) (residue 12 and name H6 )  | 2.54 | 0.53 | 0.66 |
| assign (residue 13 and name H2' ) (residue 14 and name H6 )  | 2.41 | 0.51 | 0.63 |
| assign (residue 13 and name H3' ) (residue 13 and name H1' ) | 3.11 | 0.65 | 0.81 |
| assign (residue 13 and name H3' ) (residue 13 and name H6 )  | 2.35 | 0.49 | 0.61 |
| assign (residue 13 and name H4' ) (residue 13 and name H1' ) | 3.05 | 0.64 | 0.79 |
| assign (residue 14 and name H2' ) (residue 14 and name H1' ) | 2.57 | 0.54 | 0.67 |
| assign (residue 14 and name H3' ) (residue 15 and name H8 )  | 3.08 | 0.65 | 0.80 |
| assign (residue 27 and name H4' ) (residue 27 and name H1' ) | 3.08 | 0.65 | 0.80 |
| assign (residue 28 and name H2' ) (residue 28 and name H8 )  | 3.68 | 0.77 | 0.96 |
| assign (residue 28 and name H2' ) (residue 29 and name H1' ) | 4.33 | 0.91 | 1.13 |
| assign (residue 28 and name H2' ) (residue 29 and name H8 )  | 2.48 | 0.52 | 0.65 |
| assign (residue 28 and name H3' ) (residue 28 and name H1' ) | 3.21 | 0.67 | 0.84 |
| assign (residue 28 and name H3' ) (residue 28 and name H8 )  | 2.89 | 0.61 | 0.75 |
| assign (residue 28 and name H3' ) (residue 29 and name H8 )  | 3.28 | 0.69 | 0.85 |
| assign (residue 28 and name H4' ) (residue 28 and name H1' ) | 3.18 | 0.67 | 0.83 |
| assign (residue 29 and name H2' ) (residue 29 and name H8 )  | 4.42 | 0.93 | 1.15 |
| assign (residue 29 and name H2' ) (residue 30 and name H1' ) | 4.37 | 0.92 | 1.14 |
| assign (residue 29 and name H2' ) (residue 30 and name H8 )  | 2.48 | 0.52 | 0.64 |
| assign (residue 29 and name H3' ) (residue 29 and name H8 )  | 2.81 | 0.59 | 0.73 |
| assign (residue 29 and name H3' ) (residue 30 and name H8 )  | 3.38 | 0.71 | 0.88 |
| assign (residue 30 and name H2' ) (residue 30 and name H1' ) | 2.77 | 0.58 | 0.72 |
| assign (residue 30 and name H2' ) (residue 31 and name H8 )  | 2.49 | 0.52 | 0.65 |
| assign (residue 30 and name H3' ) (residue 30 and name H1' ) | 3.99 | 0.84 | 1.04 |
| assign (residue 30 and name H3' ) (residue 30 and name H8 )  | 2.88 | 0.61 | 0.75 |
| assign (residue 30 and name H3' ) (residue 31 and name H8 )  | 3.74 | 0.79 | 0.97 |

## Distance restraints for AMBER modeling of 19-nt duplex (continued)

```

assign (residue 30 and name H4' ) (residue 30 and name H1' ) 3.47 0.73 0.90
assign (residue 31 and name H2' ) (residue 31 and name H1' ) 2.61 0.55 0.68
assign (residue 31 and name H3' ) (residue 31 and name H1' ) 3.82 0.80 0.99
assign (residue 31 and name H3' ) (residue 31 and name H8 ) 2.78 0.58 0.72
assign (residue 31 and name H4' ) (residue 31 and name H1' ) 3.34 0.70 0.87
assign (residue 32 and name H2' ) (residue 33 and name H6 ) 2.44 0.51 0.63
assign (residue 32 and name H3' ) (residue 33 and name H6 ) 3.21 0.67 0.83
assign (residue 33 and name H2' ) (residue 34 and name H1' ) 3.64 0.76 0.95
assign (residue 33 and name H2' ) (residue 34 and name H8 ) 2.34 0.49 0.61
assign (residue 33 and name H3' ) (residue 33 and name H1' ) 2.50 0.00 2.00
assign (residue 33 and name H3' ) (residue 33 and name H6 ) 2.43 0.51 0.63
assign (residue 34 and name H2' ) (residue 34 and name H8 ) 3.51 0.74 0.91
assign (residue 34 and name H2' ) (residue 35 and name H1' ) 3.71 0.78 0.96
assign (residue 34 and name H2' ) (residue 35 and name H6 ) 2.44 0.51 0.63
assign (residue 34 and name H3' ) (residue 34 and name H8 ) 2.53 0.53 0.66
assign (residue 35 and name H3' ) (residue 35 and name H6 ) 2.51 0.53 0.65
assign (residue 7 and name H1' ) (residue 7 and name H8 ) 4.05 0.85 1.05
assign (residue 8 and name H1' ) (residue 8 and name H6 ) 3.83 0.80 0.99
assign (residue 8 and name H3' ) (residue 8 and name H1' ) 3.19 0.67 0.83
assign (residue 10 and name H1' ) (residue 10 and name H8 ) 3.02 0.63 0.78
assign (residue 11 and name H1' ) (residue 11 and name H8 ) 3.20 0.00 0.90
assign (residue 12 and name H1' ) (residue 12 and name H6 ) 3.20 0.00 0.90
assign (residue 13 and name H1' ) (residue 13 and name H6 ) 4.48 0.94 1.17
assign (residue 15 and name H1' ) (residue 15 and name H8 ) 3.79 0.80 0.98
assign (residue 29 and name H2' ) (residue 29 and name H1' ) 2.45 0.51 0.64
assign (residue 29 and name H3' ) (residue 29 and name H1' ) 2.50 0.00 2.00
assign (residue 31 and name H2' ) (residue 32 and name H8 ) 3.17 0.67 0.82
assign (residue 32 and name H1' ) (residue 31 and name H2 ) 3.51 0.74 0.91
assign (residue 34 and name H1' ) (residue 9 and name H2 ) 4.10 0.86 1.07
assign (residue 34 and name H2' ) (residue 34 and name H1' ) 2.39 0.50 0.62
assign (residue 34 and name H3' ) (residue 34 and name H1' ) 3.10 0.65 0.81
assign (residue 34 and name H3' ) (residue 35 and name H6 ) 3.00 0.63 0.78
assign (residue 35 and name H1' ) (residue 35 and name H6 ) 3.84 0.81 1.00
assign (residue 36 and name H1' ) (residue 36 and name H8 ) 4.10 0.86 1.07

assign (resid 7 and name H1 ) (resid 35 and name N3 ) 2.1 0.3 0.3
assign (resid 7 and name O6 ) (resid 35 and name H41 ) 2.1 0.3 0.3
assign (resid 7 and name H22 ) (resid 35 and name O2 ) 2.1 0.3 0.3
assign (resid 8 and name N3 ) (resid 34 and name H1 ) 2.1 0.3 0.3
assign (resid 8 and name H41 ) (resid 34 and name O6 ) 2.1 0.3 0.3
assign (resid 8 and name O2 ) (resid 34 and name H22 ) 2.1 0.3 0.3
assign (resid 9 and name N1 ) (resid 33 and name H3 ) 2.1 0.3 0.3
assign (resid 9 and name H61 ) (resid 33 and name O4 ) 2.1 0.3 0.3
assign (resid 12 and name N3 ) (resid 30 and name H1 ) 2.1 0.3 0.3
assign (resid 12 and name H41 ) (resid 30 and name O6 ) 2.1 0.3 0.3
assign (resid 12 and name O2 ) (resid 30 and name H22 ) 2.1 0.3 0.3
assign (resid 13 and name N3 ) (resid 29 and name H1 ) 2.1 0.3 0.3
assign (resid 13 and name H41 ) (resid 29 and name O6 ) 2.1 0.3 0.3
assign (resid 13 and name O2 ) (resid 29 and name H22 ) 2.1 0.3 0.3
assign (resid 14 and name N3 ) (resid 28 and name H1 ) 2.1 0.3 0.3
assign (resid 14 and name H41 ) (resid 28 and name O6 ) 2.1 0.3 0.3
assign (resid 14 and name O2 ) (resid 28 and name H22 ) 2.1 0.3 0.3
assign (resid 15 and name N1 ) (resid 27 and name H3 ) 2.1 0.3 0.3

```



**Distance restraints for AMBER modeling of 19-nt duplex (continued)**

assign (resid 15 and name H61 ) (resid 27 and name O4 ) 2.1 0.3 0.3

### Dihedral restraints for AMBER modeling of 19-nt duplex (continued)

|    |     |       |        |       |    |     |        |        |       |
|----|-----|-------|--------|-------|----|-----|--------|--------|-------|
| 8  | CYT | ALPHA | -155.0 | 25.0  | 7  | GUA | EPSILN | -240.0 | 10.0  |
| 9  | ADE | ALPHA | -155.0 | 25.0  | 8  | CYT | EPSILN | -240.0 | 10.0  |
| 13 | CYT | ALPHA | -155.0 | 25.0  | 12 | CYT | EPSILN | -240.0 | 10.0  |
| 14 | CYT | ALPHA | -155.0 | 25.0  | 13 | CYT | EPSILN | -240.0 | 10.0  |
| 15 | ADE | ALPHA | -155.0 | 25.0  | 14 | CYT | EPSILN | -240.0 | 10.0  |
| 28 | GUA | ALPHA | -155.0 | 25.0  | 27 | URA | EPSILN | -240.0 | 10.0  |
| 29 | GUA | ALPHA | -155.0 | 25.0  | 28 | GUA | EPSILN | -240.0 | 10.0  |
| 30 | GUA | ALPHA | -155.0 | 25.0  | 29 | GUA | EPSILN | -240.0 | 10.0  |
| 34 | GUA | ALPHA | -155.0 | 25.0  | 33 | URA | EPSILN | -240.0 | 10.0  |
| 35 | CYT | ALPHA | -155.0 | 25.0  | 34 | GUA | EPSILN | -240.0 | 10.0  |
| 36 | ADE | ALPHA | -155.0 | 25.0  | 35 | CYT | EPSILN | -240.0 | 10.0  |
| 8  | CYT | BETA  | 90.0   | 240.0 | 7  | GUA | ZETA   | -160.0 | 20.0  |
| 9  | ADE | BETA  | 90.0   | 240.0 | 8  | CYT | ZETA   | -160.0 | 20.0  |
| 13 | CYT | BETA  | 90.0   | 240.0 | 12 | CYT | ZETA   | -160.0 | 20.0  |
| 14 | CYT | BETA  | 90.0   | 240.0 | 13 | CYT | ZETA   | -160.0 | 20.0  |
| 15 | ADE | BETA  | 90.0   | 240.0 | 14 | CYT | ZETA   | -160.0 | 20.0  |
| 28 | GUA | BETA  | 90.0   | 240.0 | 27 | URA | ZETA   | -160.0 | 20.0  |
| 29 | GUA | BETA  | 90.0   | 240.0 | 28 | GUA | ZETA   | -160.0 | 20.0  |
| 30 | GUA | BETA  | 90.0   | 240.0 | 29 | GUA | ZETA   | -160.0 | 20.0  |
| 34 | GUA | BETA  | 90.0   | 240.0 | 33 | URA | ZETA   | -160.0 | 20.0  |
| 35 | CYT | BETA  | 90.0   | 240.0 | 34 | GUA | ZETA   | -160.0 | 20.0  |
| 36 | ADE | BETA  | 90.0   | 240.0 | 35 | CYT | ZETA   | -160.0 | 20.0  |
| 7  | GUA | GAMMA | 0.0    | 120.0 | 7  | GUA | CHI    | 170.0  | 340.0 |
| 8  | CYT | GAMMA | 0.0    | 120.0 | 8  | CYT | CHI    | 170.0  | 340.0 |
| 9  | ADE | GAMMA | 0.0    | 120.0 | 9  | ADE | CHI    | 170.0  | 340.0 |
| 13 | CYT | GAMMA | 0.0    | 120.0 | 12 | CYT | CHI    | 170.0  | 340.0 |
| 14 | CYT | GAMMA | 0.0    | 120.0 | 13 | CYT | CHI    | 170.0  | 340.0 |
| 15 | ADE | GAMMA | 0.0    | 120.0 | 14 | CYT | CHI    | 170.0  | 340.0 |
| 27 | URA | GAMMA | 0.0    | 120.0 | 15 | ADE | CHI    | 170.0  | 340.0 |
| 28 | GUA | GAMMA | 0.0    | 120.0 | 27 | URA | CHI    | 170.0  | 340.0 |
| 29 | GUA | GAMMA | 0.0    | 120.0 | 28 | GUA | CHI    | 170.0  | 340.0 |
| 30 | GUA | GAMMA | 0.0    | 120.0 | 29 | GUA | CHI    | 170.0  | 340.0 |
| 34 | GUA | GAMMA | 0.0    | 120.0 | 30 | GUA | CHI    | 170.0  | 340.0 |
| 35 | CYT | GAMMA | 0.0    | 120.0 | 31 | ADE | CHI    | 170.0  | 340.0 |
| 36 | ADE | GAMMA | 0.0    | 120.0 | 32 | GUA | CHI    | 170.0  | 340.0 |
| 7  | GUA | DELTA | 45.0   | 115.0 | 33 | URA | CHI    | 170.0  | 340.0 |
| 8  | CYT | DELTA | 45.0   | 115.0 | 34 | GUA | CHI    | 170.0  | 340.0 |
| 9  | ADE | DELTA | 45.0   | 115.0 | 35 | CYT | CHI    | 170.0  | 340.0 |
| 10 | GUA | DELTA | 45.0   | 115.0 | 36 | ADE | CHI    | 170.0  | 340.0 |
| 11 | GUA | DELTA | 45.0   | 115.0 |    |     |        |        |       |
| 12 | CYT | DELTA | 45.0   | 115.0 |    |     |        |        |       |
| 13 | CYT | DELTA | 45.0   | 115.0 |    |     |        |        |       |
| 14 | CYT | DELTA | 45.0   | 115.0 |    |     |        |        |       |
| 15 | ADE | DELTA | 45.0   | 115.0 |    |     |        |        |       |
| 27 | URA | DELTA | 45.0   | 115.0 |    |     |        |        |       |
| 28 | GUA | DELTA | 45.0   | 115.0 |    |     |        |        |       |
| 29 | GUA | DELTA | 45.0   | 115.0 |    |     |        |        |       |
| 30 | GUA | DELTA | 45.0   | 115.0 |    |     |        |        |       |
| 31 | ADE | DELTA | 45.0   | 115.0 |    |     |        |        |       |
| 32 | GUA | DELTA | 45.0   | 115.0 |    |     |        |        |       |
| 33 | URA | DELTA | 45.0   | 115.0 |    |     |        |        |       |
| 34 | GUA | DELTA | 45.0   | 115.0 |    |     |        |        |       |
| 35 | CYT | DELTA | 45.0   | 115.0 |    |     |        |        |       |
| 36 | ADE | DELTA | 45.0   | 115.0 |    |     |        |        |       |

## REFERENCES

1. Shen, Y., Lange, O., Delaglio, F., Rossi, P., Aramini, J. M., Liu, G., Eletsky, A., Wu, Y., Singarapu, K. K., Lemak, A., Ignatchenko, A., Arrowsmith, C. H., Szyperski, T., Montelione, G. T., Baker, D., and Bax, A. (2008) Consistent blind protein structure generation from NMR chemical shift data, *Proc. Natl. Acad. Sci. U.S.A.* *105*, 4685-4690.
2. Sripakdeevong, P., Cevec, M., Chang, A. T., Erat, M. C., Ziegeler, M., Zhao, Q., Fox, G. E., Gao, X., Kennedy, S. D., Kierzek, R., Nikonowicz, E. P., Schwalbe, H., Sigel, R. K. O., Turner, D. H., and Das, R. (2014) Structure determination of noncanonical RNA motifs guided by  $^1\text{H}$  NMR chemical shifts, *Nat. Methods* *11*, 413-416.
3. Kruschel, D., Skilandat, M., and Sigel, R. K. O. (2014) NMR structure of the 5' splice site in the group IIB intron *Sc.ai5 $\gamma$* -conformational requirements for exon-intron recognition, *RNA* *20*, 295-307.
4. Desjardins, G., Bonneau, E., Girard, N., Boisbouvier, J., and Legault, P. (2011) NMR structure of the A730 loop of the *Neurospora* VS ribozyme: Insights into the formation of the active site, *Nucleic Acids Res.* *39*, 4427-4437.
5. Korth, M. M. T., and Sigel, R. K. O. (2012) Unusually high-affinity  $\text{Mg}^{2+}$  binding at the AU-rich sequence within the antiterminator hairpin of a  $\text{Mg}^{2+}$  riboswitch, *Chem. Biodivers.* *9*, 2035-2049.
6. Marcia, M., and Pyle, A. M. (2012) Visualizing group II intron catalysis through the stages of splicing, *Cell* *151*, 497-507.
